# Supplementary material for: Sulfur-doped anthanthrenes as effective organic photocatalysts for metal-free ATRP and PET-RAFT polymerization under blue and green light
Source: Royal Society of Chemistry journal article supplement (doi:10.1039/d4py00804a), 2024-01-01
Supplement: d4py00804a1.pdf [file d4py00804a1.pdf]

## Supporting Information

### **Sulfur-doped anthanthrenes as effective organic photocatalysts for metal-free ATRP and PET-RAFT polymerization under blue and green light**

Hui Shao,<sup>a,c</sup> Shaojie Li,<sup>a</sup> Yuqing Jiang,<sup>b</sup> Jinshuai Song,<sup>b</sup> Xun Zhang,<sup>a</sup> Jianxu Chen,<sup>c</sup>  
and Saihu Liao\*<sup>a,c</sup>

<sup>a</sup> Key Laboratory of Molecule Synthesis and Function Discovery (Fujian Province University), College of Chemistry, Fuzhou University, Fuzhou 350108, China

<sup>b</sup> College of Chemistry, Pingyuan Laboratory, and Laboratory of Synthetic Biology, Zhengzhou University, Zhengzhou, Henan 450001, China

<sup>c</sup> State Key Laboratory of Physical Chemistry of Solid Surfaces, College of Chemistry and Chemical Engineering, Xiamen University, Xiamen 361005, China

# Contents

|                                                                                              |    |
|----------------------------------------------------------------------------------------------|----|
| 1. Photoreaction Setup .....                                                                 | 3  |
| 2. Synthesis and Characterization of (SDA)s and SeDA .....                                   | 6  |
| Acid-mediated Cyclization of Arylmethyl Sulfide <sup>1,2</sup> .....                         | 10 |
| 3. Characterization of Catalyst Properties.....                                              | 14 |
| UV-Vis Absorption Spectra.....                                                               | 14 |
| Fluorescence Spectroscopy .....                                                              | 14 |
| Time-resolved emission decay.....                                                            | 15 |
| Cyclic Voltammetry.....                                                                      | 17 |
| Fluorescence Quenching Study.....                                                            | 18 |
| Crystal Data of SDA-2 (CCDC: 2328161) .....                                                  | 20 |
| 4. Polymerization Procedure.....                                                             | 22 |
| General Methods for Kinetic Study and Analysis of Molecular Weight Growth <sup>3</sup> ..... | 22 |
| General Procedure for PMMA Macroinitiator Synthesis.....                                     | 22 |
| Polymerization Procedure for Chain Extension from PMMA Macroinitiator .....                  | 23 |
| Chain Extension and Block Copolymer Synthesis from PMMA Macroinitiator.....                  | 23 |
| General Procedure for PET-RAFT Polymerizations.....                                          | 25 |
| Monomer scope in O-ATRP .....                                                                | 27 |
| Gel-Permeation Chromatography Traces.....                                                    | 28 |
| NMR Spectra of Precipitated Polymer Products.....                                            | 29 |
| 5. NMR Spectra .....                                                                         | 32 |
| 6. Computational detail.....                                                                 | 39 |
| 7. Reference .....                                                                           | 53 |

## 1. Photoreaction Setup

As shown above (**Figure S1**), all polymerization reactions were conducted in a 6 W blue photo-reactor placed 1 cm from light, which was purchased from <http://www.geaochem.com/> (Model: H106062, GEAO CHEMICAL). The reactor has a fan for cooling and its light intensity to be  $\sim 30 \text{ mW/cm}^2$ .

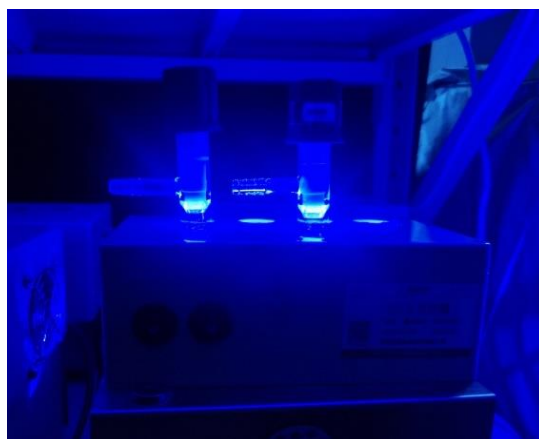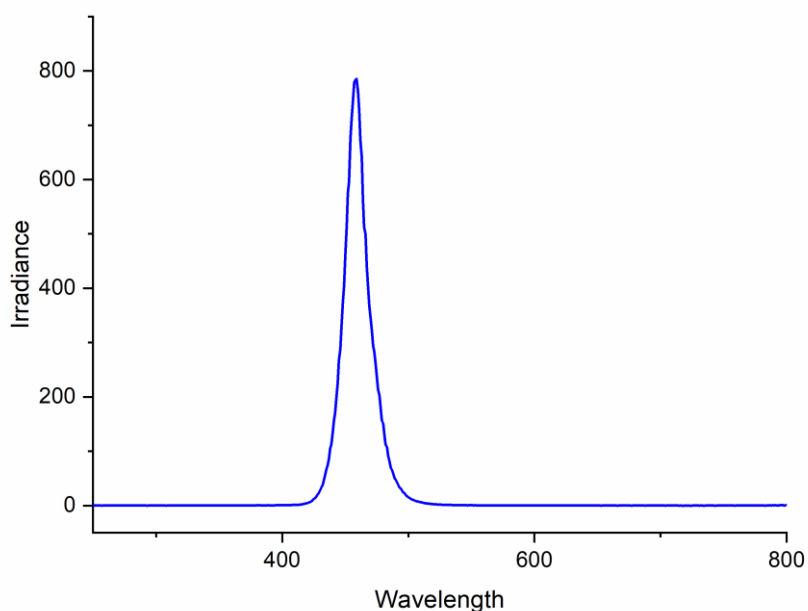

**Figure S1.** The reaction setup of ATRP polymerizations with 6 W blue LEDs ( $\lambda_{\text{max}} = 460 \text{ nm}$ ).

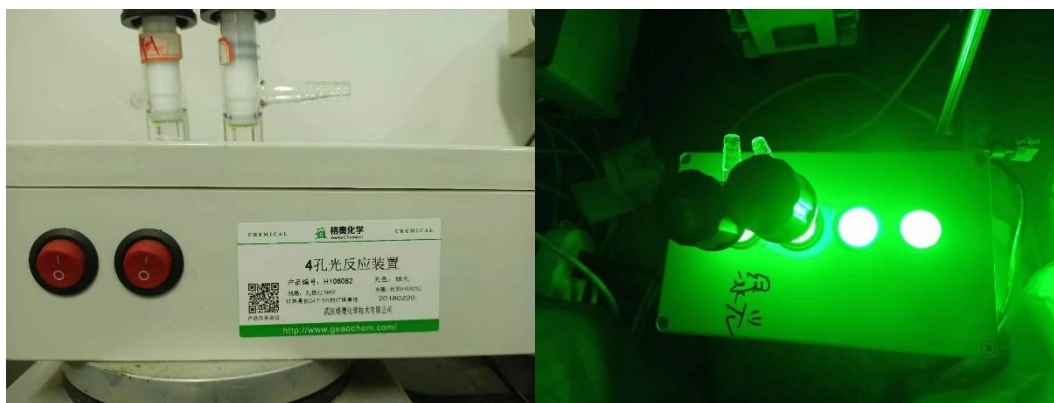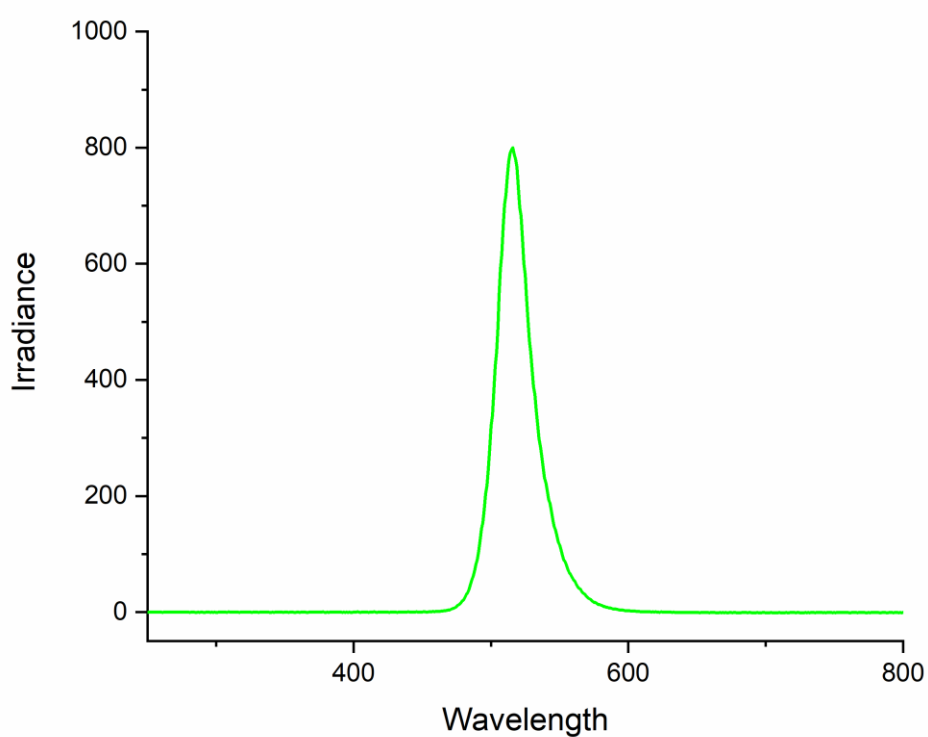

**Figure S2.** The reaction setup of ATRP polymerizations with 6 W green LEDs ( $\lambda_{\text{max}} = 516 \text{ nm}$ ).

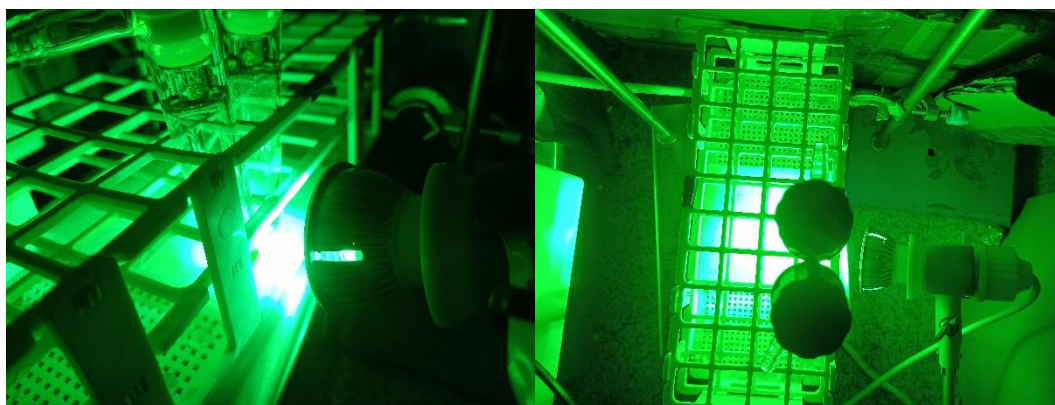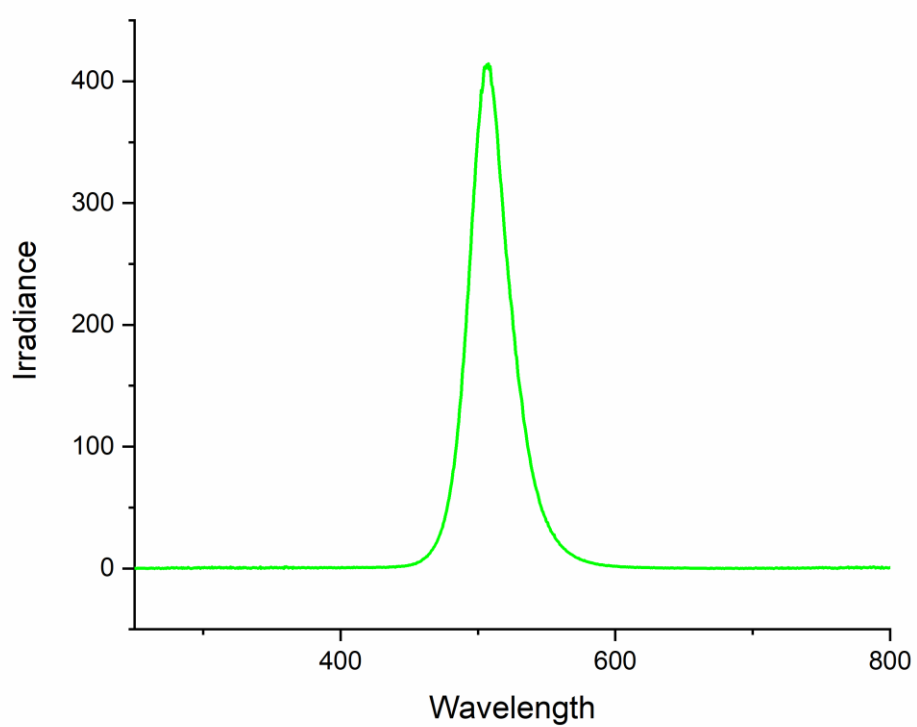

**Figure S3.** The reaction setup of PET-RAFT polymerizations with 3 W green bulbs ( $\lambda_{\text{max}} = 516$  nm).

## 2. Synthesis and Characterization of (SDA)s and SeDA

### Synthesis of 2,2'-bis(methylthio)-1,1'-binaphthalene (SDA-1a)

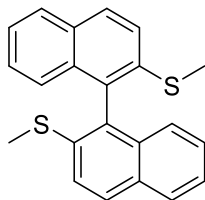

**SDA-1a**

The synthesis of SDA and SeDA photocatalysts was performed according to literature procedure.<sup>3,4</sup> A solution of 2,2'-dibromo-1,1'-binaphthyl (1.24 g, 3 mmol) in THF (12 mL) in a dried 50 mL round-bottom flask was cooled to -78 °C and n-BuLi solution (1.6 M in cyclohexane, 1.89 mL, 3.03 mmol) was added. After stirring for 1 h, 1,2-dimethyldisulfane (0.53 mL, 6 mmol) was added and 10 min later the reaction was allowed to warm to room temperature. The solution was concentrated on a rotary evaporator and then purified by flash chromatography (cyclohexane) to yield (2'-bromo-[1,1'-binaphthalen]-2-yl)(methyl)sulfane (0.93 g, 82 % yield) as a colorless solid. Notice: Product decomposition in solution after prolonged exposure in air.

**<sup>1</sup>H NMR (500 MHz, Chloroform-*d*):**  $\delta$  7.97 (d,  $J = 8.8$  Hz, 2H), 7.88 (d,  $J = 8.1$  Hz, 2H), 7.58 (d,  $J = 8.8$  Hz, 2H), 7.38 (t,  $J = 7.8, 6.7$  Hz, 2H), 7.26 – 7.21 (m, 2H), 7.00 (d,  $J = 8.6$  Hz, 2H), 2.42 (s, 6H).

**<sup>13</sup>C NMR (126 MHz, Chloroform-*d*):**  $\delta$  136.68, 132.67, 132.48, 131.46, 129.06, 128.30, 127.11, 125.32, 124.96, 123.26, 15.88.

**Synthesis of (6,6'-dibromo-[1,1'-binaphthalene]-2,2'-diyl)bis(methylsulfane) (SDA-2a)**

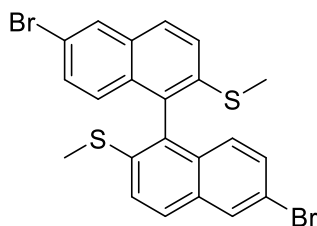

**SDA-2a**

2,2'-bis(methylthio)-1,1'-binaphthalene 1.04 g (3.0 mmol) was dissolved in 15 mL  $\text{CH}_2\text{Cl}_2$  and stirred at 0 °C. 0.7 mL (12.0 mmol) Bromine was added in one portion with stirring and a stream of nitrogen was bubbled through the solution to remove the evolving HBr. The reaction mixture was stirred for 5 h while the flask was allowed to warm to room temperature. The reaction mixture was quenched by the addition of saturated  $\text{Na}_2\text{S}_2\text{O}_3$  solution (20 mL) and extracted with  $\text{CH}_2\text{Cl}_2$  (3  $\times$  50 mL). During this procedure, the product precipitates as a white solid and was filtered off and dried in vacuo to give desired product (1.4 g, 92%) as a white powder.

**$^1\text{H}$  NMR (500 MHz, Chloroform-*d*):**  $\delta$  8.05 (s, 2H), 7.90 (d,  $J$  = 8.8 Hz, 2H), 7.60 (d,  $J$  = 8.7 Hz, 2H), 7.32 (d,  $J$  = 9.0 Hz, 2H), 6.83 (d,  $J$  = 9.1 Hz, 2H), 2.44 (s, 6H).

**$^{13}\text{C}$  NMR (101 MHz,  $\text{CDCl}_3$ ):**  $\delta$  137.65, 132.56, 131.80, 131.04, 130.61, 130.38, 128.31, 126.55, 124.26, 119.44, 14.19.

**Synthesis of (6,6'-dibromo-[1,1'-binaphthalene]-2,2'-diyl)bis(methylsulfane) (SDA-2b)**

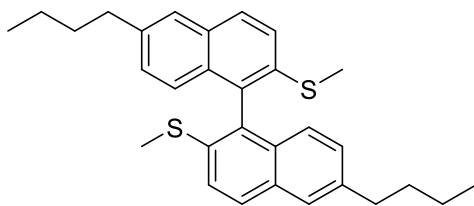

**SDA-2b**

To a suspension of **SDA-2a** (390 mg, 0.773 mmol) and [Pd(dppf)Cl<sub>2</sub>] (29 mg, 0.039 mmol) in dry THF (25 mL) under N<sub>2</sub>, *n*-BuMgBr was added dropwise (3.8 mL, 3.8 mmol, 1 M solution in THF) at 0 °C. The mixture was stirred under reflux at 90 °C for 2.5 h and then at r.t. overnight. sat. NH<sub>4</sub>Cl (aq.) solution (20 mL) was added, and the mixture extracted with EtOAc (3 × 20 mL). The combined organic phases were washed with brine, dried over MgSO<sub>4</sub>, filtered and concentrated in vacuo. The crude product was purified by column chromatography (SiO<sub>2</sub>, petroleum ether/CH<sub>2</sub>Cl<sub>2</sub> 10:1), to afford **SDA-2b** (230 mg, 65%) as a white glue.

**<sup>1</sup>H NMR (400 MHz, Chloroform-*d*):** δ 7.90 (s, 2H), 7.66 (s, 2H), 7.55 (d, *J* = 8.7 Hz, 2H), 7.10 (d, *J* = 8.8 Hz, 2H), 6.93 (d, *J* = 8.7 Hz, 2H), 2.71 (t, *J* = 7.8 Hz, 4H), 2.42 (s, 6H), 1.69 – 1.61 (m, 4H), 1.42 – 1.34 (m, 4H), 0.93 (t, *J* = 7.3 Hz, 6H).

**<sup>13</sup>C NMR (101 MHz, CDCl<sub>3</sub>):** δ 139.85, 135.31, 132.73, 131.67, 131.21, 128.71, 128.52, 126.67, 124.91, 123.39, 35.77, 33.44, 22.64, 16.04, 14.14.



**Synthesis of (6,6'-bis(4-methoxyphenyl)-[1,1'-binaphthalene]-2,2'-diyl)bis(methylsulfane) (SDA-3a)**

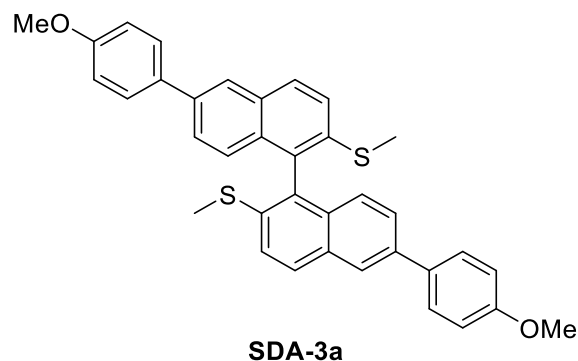

To a suspension of **SDA-2a** (200 mg, 0.773 mmol) and [Pd(dppf)Cl<sub>2</sub>] (29 mg, 0.039 mmol) in dry THF (25 mL) under N<sub>2</sub>, 4MeOPhMgBr was added dropwise (3.8 mL, 3.8 mmol, 1 M solution in THF) at 0 °C. The mixture was stirred under reflux at 90 °C for 2.5 h and then at r.t. overnight. sat. NH<sub>4</sub>Cl (aq.) solution (20 mL) was added, and the mixture extracted with EtOAc (3 × 20 mL). The combined organic phases were washed with brine, dried over MgSO<sub>4</sub>, filtered and concentrated in vacuo. The crude product was purified by column chromatography (SiO<sub>2</sub>, petroleum ether/CH<sub>2</sub>Cl<sub>2</sub> 10:1), to afford **SDA-3a** (200 mg, 47%) as a white glue.

**<sup>1</sup>H NMR (500 MHz, Chloroform-*d*):** δ 8.05 (s, 2H), 8.03 (d, *J* = 9.2 Hz, 2H), 7.64 – 7.60 (m, 6H), 7.50 (dd, *J* = 8.8, 2.0 Hz, 2H), 7.09 (d, *J* = 8.8 Hz, 2H), 6.99 (d, *J* = 8.8 Hz, 4H), 3.86 (s, 6H), 2.47 (s, 6H).

**<sup>13</sup>C NMR (126 MHz, CDCl<sub>3</sub>):** δ 159.29, 137.59, 136.42, 133.54, 132.37, 131.85, 131.57, 129.25, 128.41, 126.70, 125.46, 123.71, 114.41, 55.47, 15.94.

## Acid-mediated Cyclization of Arylmethyl Sulfide<sup>1,2</sup>

Oxidation and Cyclization of SDA-1, SDA-2, SDA-3, and SeDA.

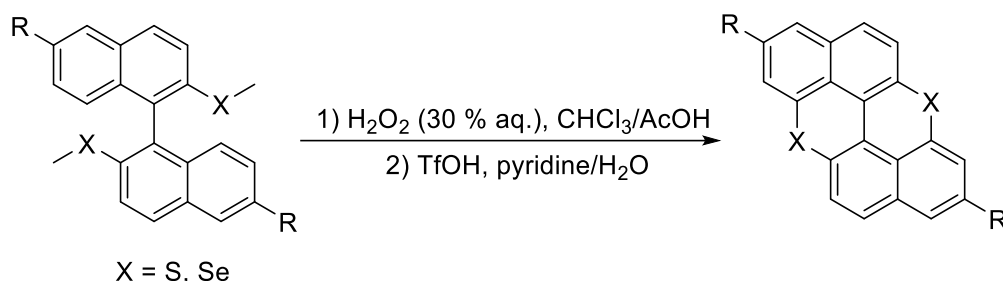

The arylated compound (0.2 mmol, 1.0 eq) and H<sub>2</sub>O<sub>2</sub>(30 % (w/w) in H<sub>2</sub>O) (0.34 mL, 15 eq) were dissolved in 1:1(v/v) CHCl<sub>3</sub>:CH<sub>3</sub>COOH mixture (12 mL). The mixture was stirred at room temperature until the complete conversion of arylmethyl sulfide on TLC (within 1 hour). The reaction mixture was quenched with saturated NaOH aq. solution at 0 °C, until pH~12. The aqueous layer was extracted with DCM three times. Combined organic extract was dried over Na<sub>2</sub>SO<sub>4</sub>. After evaporation of the solvents, the mixture was purified by column chromatography (eluent: hexane/EtOAc = 1/1).

The corresponding sulfoxide was placed in a Schlenk tube and DCE (3.0 mL) was added. With continuous N<sub>2</sub> streaming into the tube, TfOH (1.5 mL) was added dropwise. After stirring 24 hours at room temperature, 1 mL of H<sub>2</sub>O and 4 of pyridine were added and heated at 100 °C for 1 h. After cooling to rt, the solvent was removed in vacuo, and diluted with H<sub>2</sub>O and DCM. The organic layer was separated and the aqueous layer was extracted with DCM three times. The combined organic extracts was washed with H<sub>2</sub>O and brine, dried over Na<sub>2</sub>SO<sub>4</sub>, and concentrated in vacuo. The obtained crude material

was purified through column chromatography (eluent: hexane/DCM= 20/1) and GPC (CHCl<sub>3</sub>) to give the cyclized product.

**Thioxantheno[2,1,9,8-klmna]thioxanthene (SDA-1):**

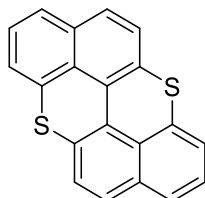

**SDA-1**

**<sup>1</sup>H NMR ((500 MHz, Methylene Chloride-*d*<sub>2</sub>):**  $\delta$  7.28 (d, *J* = 8.7 Hz, 1H), 7.14 (dd, *J* = 8.1, 1.3 Hz, 1H), 7.02 (dd, *J* = 8.1, 7.3 Hz, 1H), 6.86 (dd, *J* = 7.3, 1.3 Hz, 1H), 6.79 (d, *J* = 8.6 Hz, 1H);

**<sup>13</sup>C NMR (151 MHz, Methylene Chloride-*d*<sub>2</sub>):**  $\delta$  136.21, 131.64, 131.43, 130.68, 128.18, 127.78, 127.45, 127.39, 127.21, 122.89. HRMS (ESI<sup>+</sup>): *m/z* [M] calcd for (C<sub>20</sub>H<sub>10</sub>S<sub>2</sub>): 314.0224; found: 314.0230.

**2,8-dibutylthioxantheno[2,1,9,8-klmna]thioxanthene (SDA-2):**

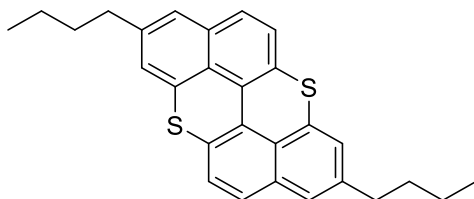

**SDA-2**

**<sup>1</sup>H NMR (500 MHz, Methylene Chloride-*d*<sub>2</sub>):**  $\delta$  7.18 (d, *J* = 8.6 Hz, 2H), 6.89 (s, 2H), 6.74 (d, *J* = 8.3 Hz, 2H), 6.72 (s, 2H), 2.48 (t, 4H), 1.58 – 1.51 (m, 4H), 1.37 – 1.29 (m, 4H), 0.90 (t, *J* = 7.4 Hz, 6H).

**$^{13}\text{C}$  NMR (126 MHz, Methylene Chloride- $d_2$ ):**  $\delta$  141.14, 134.47, 129.30, 128.35, 128.04, 125.37, 124.09, 122.05, 34.78, 32.87, 22.34, 13.72.

**HRMS (ESI $^+$ ):**  $m/z$  [M] calcd for (C<sub>28</sub>H<sub>26</sub>S<sub>2</sub>): 426.1476; found: 426.1467.

Crystals suitable for X-Ray diffraction were obtained by slow diffusion of EtOH into the solution of **SDA-2** in chloroform (CCDC: 2328161).

**2,8-bis(4-methoxyphenyl)thioxantheno[2,1,9,8-klmna]thioxanthene (SDA-3):**

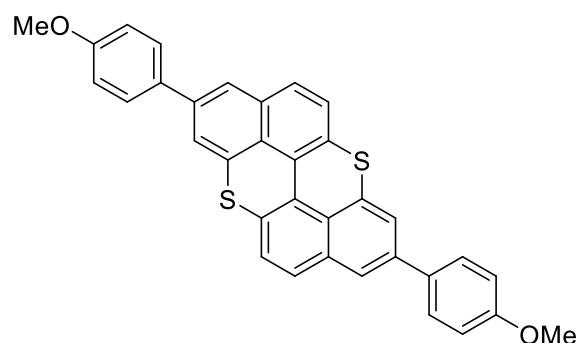

**SDA-3**

**$^1\text{H}$  NMR (500 MHz, Chloroform- $d$ ):**  $\delta$  7.52 (d,  $J = 7.7$  Hz, 4H), 7.29 (d,  $J = 8.1$  Hz, 2H), 7.26 (s, 2H), 7.09 (s, 2H), 6.97 (d,  $J = 7.7$  Hz, 4H), 6.81 (d,  $J = 7.7$  Hz, 2H), 3.86 (s, 6H).

**HRMS (APCI $^+$ ):**  $m/z$  [M+H] $^+$  calcd for (C<sub>34</sub>H<sub>23</sub>O<sub>2</sub>S<sub>2</sub>): 527.1137; found: 527.1139.

**Selenoxantheno[2,1,9,8-klmna]selenoxanthene (SeDA):**

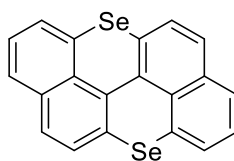

**SeDA**

**<sup>1</sup>H NMR (500 MHz, Chloroform-*d*):**  $\delta$  7.45 (d,  $J = 8.4$  Hz, 2H), 7.36 (dd,  $J = 7.9, 1.4$  Hz, 2H), 7.28 (td,  $J = 7.3, 1.1$  Hz, 2H), 7.19 (d,  $J = 8.4$  Hz, 2H), 7.14 (dd,  $J = 8.0, 7.2$  Hz, 2H);

**<sup>13</sup>C NMR (126 MHz, CDCl<sub>3</sub>):**  $\delta$  135.02, 131.69, 130.02, 128.98, 126.77, 126.39, 125.71, 124.86.

### 3. Characterization of Catalyst Properties

#### UV-Vis Absorption Spectra

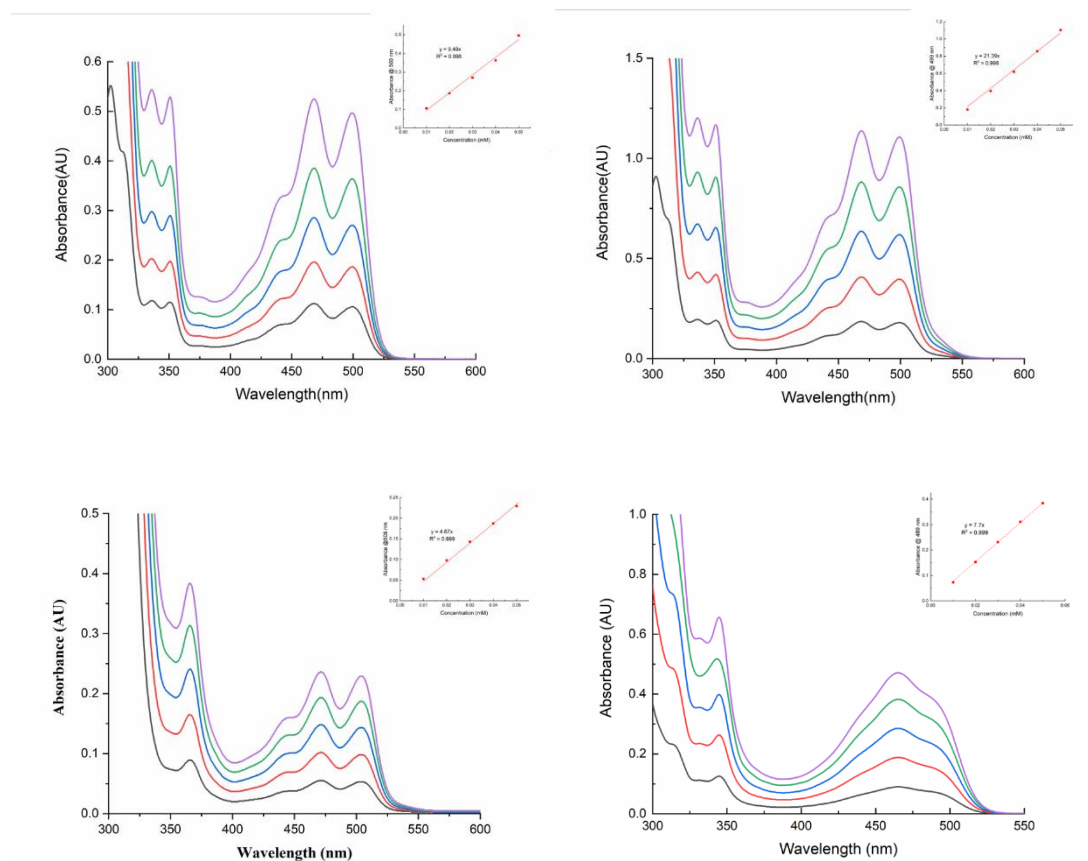

**Figure S4.** UV-Vis spectra of catalysts SDA-1, SDA-2, SDA-3 and SeDA at different concentration in DCM.

#### Fluorescence Spectroscopy

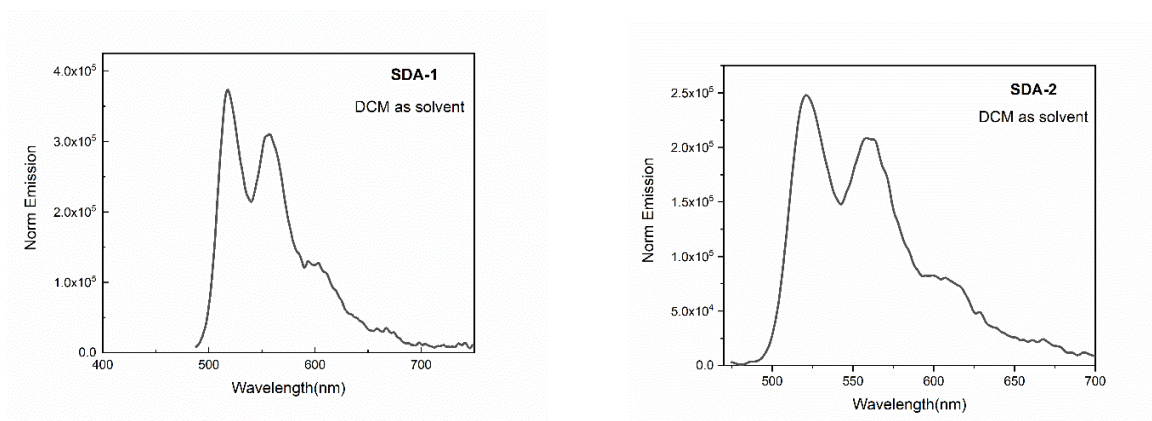

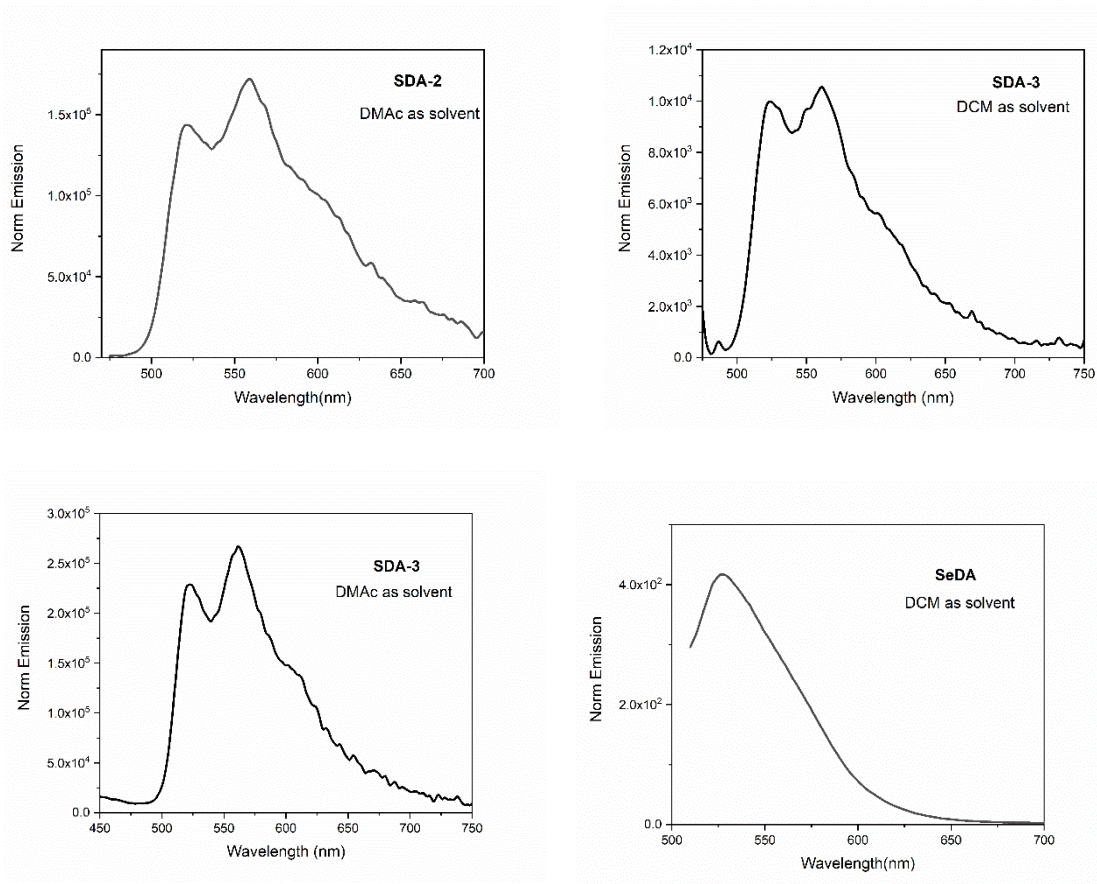

Figure S5. Fluorescence emission spectra of SDAs and SeDA.

### Time-resolved emission decay

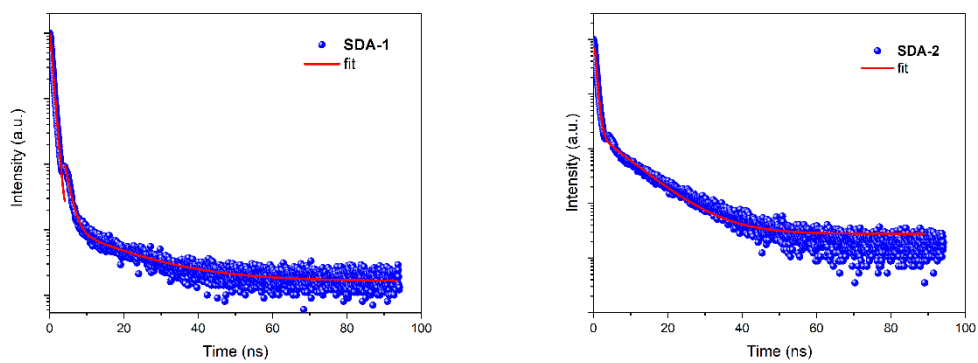

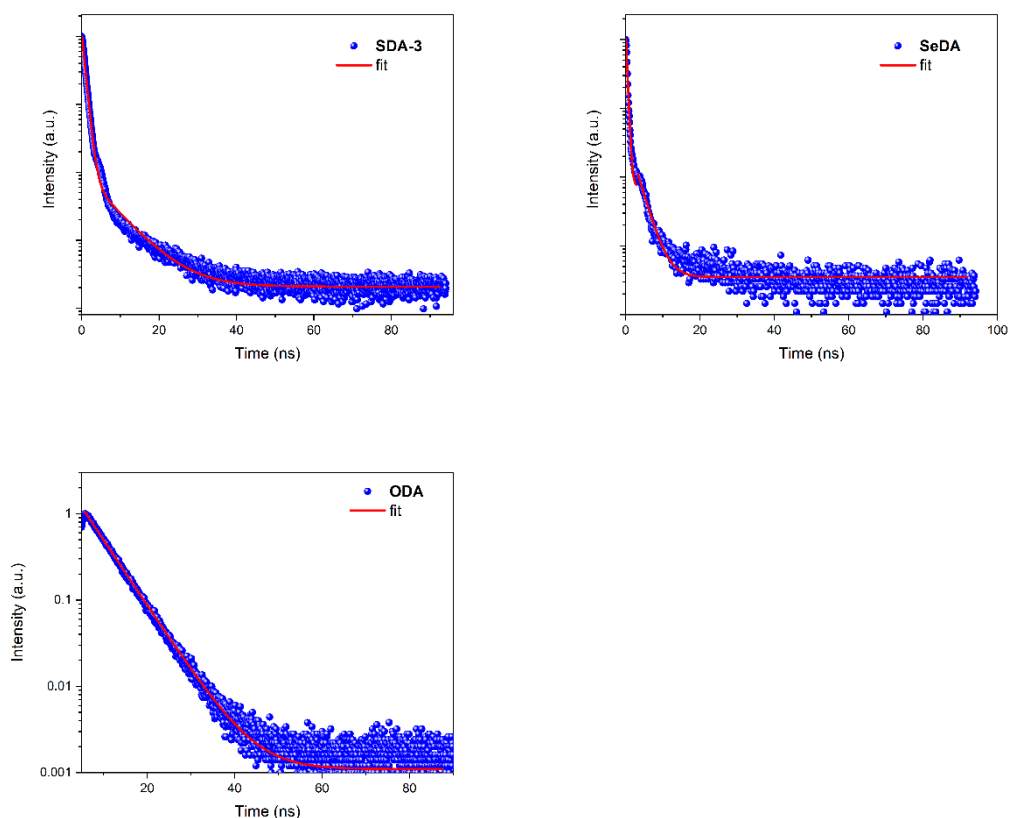

**Figure S6.** Time-resolved emission decay curves of catalyst **SDA-1** (A), **SDA-2** (B), **SDA-3** (C), **SeDA** (D) and **ODA** (E) in DCM.

**Table S1.** Lifetime data of PCs in DCM under a N<sub>2</sub> atmosphere at RT.

| Entry | PCs   | Lifetime        | Weight | $\chi^2$ |
|-------|-------|-----------------|--------|----------|
| 1     | SDA-1 | $\tau_1 = 0.59$ | 99.3%  | 1.18     |
|       |       | $\tau_2 = 5.20$ | 0.7%   |          |
| 2     | SDA-2 | $\tau_1 = 0.52$ | 98.5%  | 1.15     |
|       |       | $\tau_2 = 8.00$ | 1.5%   |          |
| 3     | SDA-3 | $\tau_1 = 0.75$ | 99.1%  | 1.28     |
|       |       | $\tau_2 = 6.80$ | 0.9%   |          |
| 4     | SeDA  | $\tau_1 = 0.34$ | 96.8%  | 1.55     |
|       |       | $\tau_2 = 2.32$ | 3.2%   |          |
| 5     | ODA   | $\tau = 5.62$   | 100%   | 1.27     |



## Cyclic Voltammetry

General Procedure: Cyclic voltammograms of the photoredox catalysts were performed in a 3-compartment electrochemical cell with Ag/AgCl as the reference electrode, n-Bu<sub>4</sub>NPF<sub>6</sub> in DCM (0.1 M) as the electrolyte solution, glassy carbon electrode for the working and a platinum wire for counter electrodes.

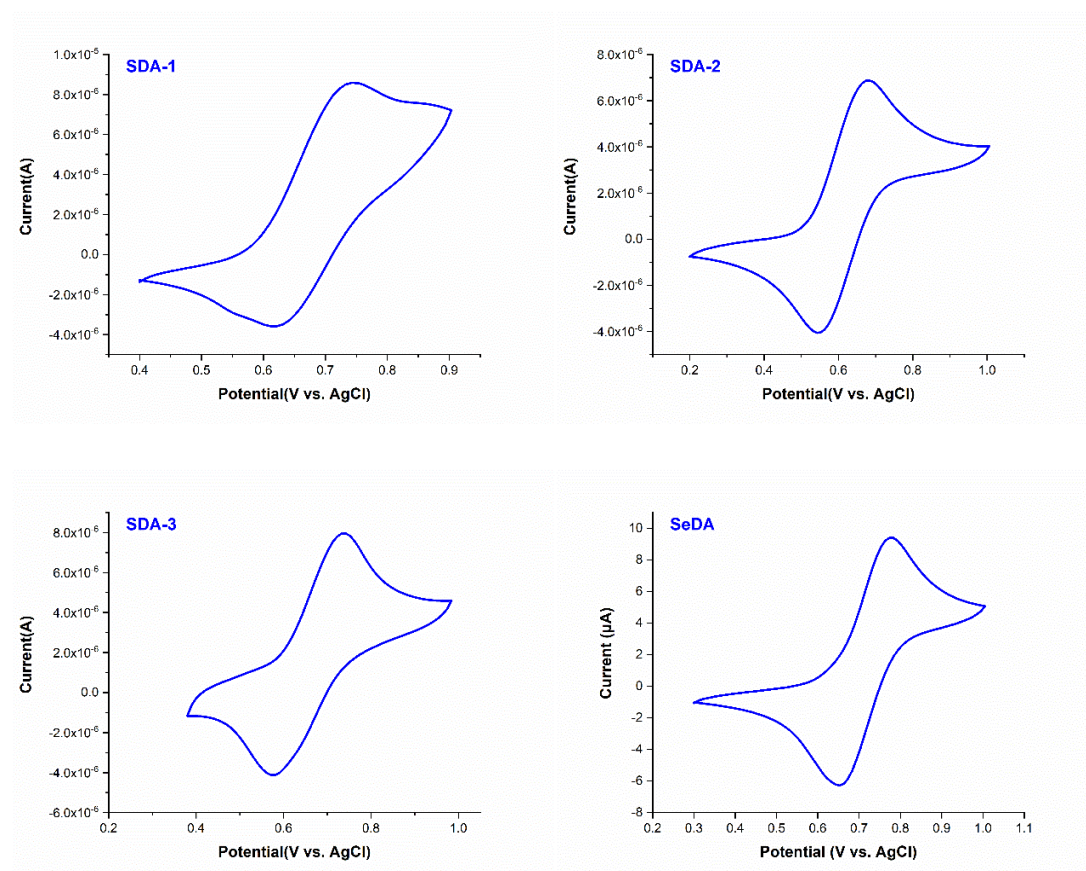

**Figure S7.** Cyclic voltammograms of the SDA-1 (A), SDA-2 (B), SDA-3 (C) and SeDA (D) at 50 mV/s in DCM performed in a 3-compartment electrochemical cell.

## Experimental Determination of Excited State Reduction Potentials

The singlet excited reduction potential of PC in DCM vs the saturated calomel electrode (SCE) as determined from the following equation:

$$E^0(\text{PC}^{\cdot+}/\text{PC}^*, \text{ vs SCE}) = E^0(\text{PC}^{\cdot+}/\text{PC}, \text{ vs SCE}) - E_{s1}$$

**Table S2.** Experimentally measured excited state reduction potentials of doped catalysts

| Molecule | $\lambda_{\text{onset}}$ | $E_{s1}^a (E'_{s1}{}^b)$ | $E^0(\text{PC}^{\cdot+}/\text{PC})$ | $E^{0*}(\text{PC}^{\cdot+}/^1\text{PC}^*)$<br>( $E'^c$ ) | $E^{0*}(\text{PC}^{\cdot+}/^3\text{PC})^d$ |
|----------|--------------------------|--------------------------|-------------------------------------|----------------------------------------------------------|--------------------------------------------|
| ODA      | 468                      | 2.65(2.58)               | 0.82                                | -1.83(-1.76)                                             | -1.63 <sup>d</sup>                         |
| SDA-1    | 509                      | 2.45(2.23)               | 0.64                                | -1.81(-1.59)                                             | -1.55                                      |
| SDA-2    | 511                      | 2.42(2.21)               | 0.56                                | -1.86(-1.65)                                             | -1.60                                      |
| SDA-3    | 514                      | 2.42(2.20)               | 0.62                                | -1.80(-1.58)                                             | -1.56                                      |
| SeDA     | 509                      | 2.39(2.35)               | 0.67                                | -1.72(-1.68)                                             | -1.61                                      |

<sup>a</sup> Calculated from the onset of absorption spectra. <sup>b</sup> Calculated from the maximum of emission  $\lambda_{\text{max}}$ . <sup>c</sup> Calculated by  $E_0(\text{PC}^{\cdot+}/\text{PC}) - E'_{s1}$ . <sup>d</sup> calculated reduction potentials.

### Fluorescence Quenching Study

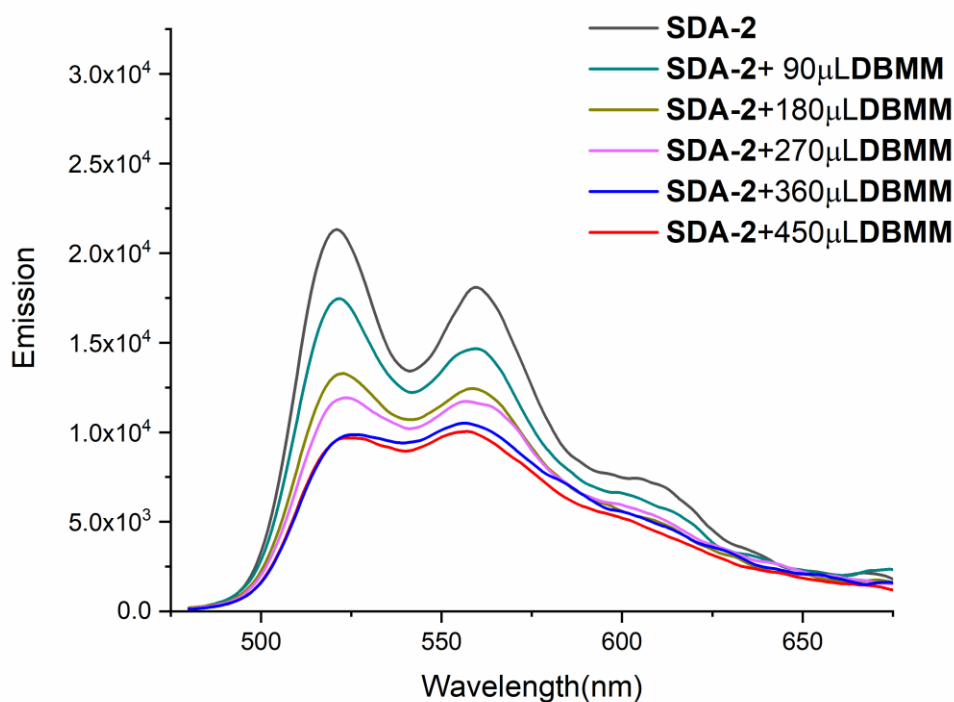**Figure S8.** Fluorescence spectra of **SDA-2** using DBMM as quencher.

The solutions of **SDA-2** were excited at 470 nm and the fluorescence spectra were

recorded between 521 and 560 nm. The emission of a 0.20 mM solution of **SDA-2** in DCM was measured at varying volumes of diethyl 2-bromo-2-methylmalonate (DBMM, 157 mM). As shown in **Figure S8** a significant fluorescence quenching by addition of DBMM was observed.

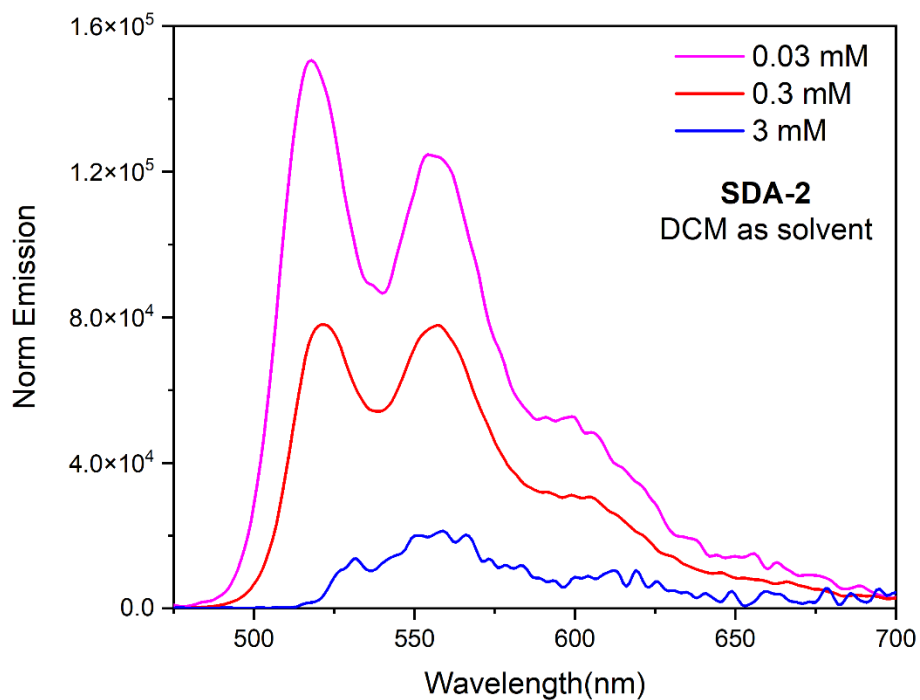

**Figure S9.** Fluorescence spectra of **SDA-2** at different concentrations in argon saturated DCM. As the **SDA-2** concentration increases,  $\pi$ - $\pi$  stacking effect leads to a significant red shift in fluorescence, with the main emission peak shifting from 521 nm to 560 nm.

**Crystal Data of SDA-2 (CCDC: 2328161)**

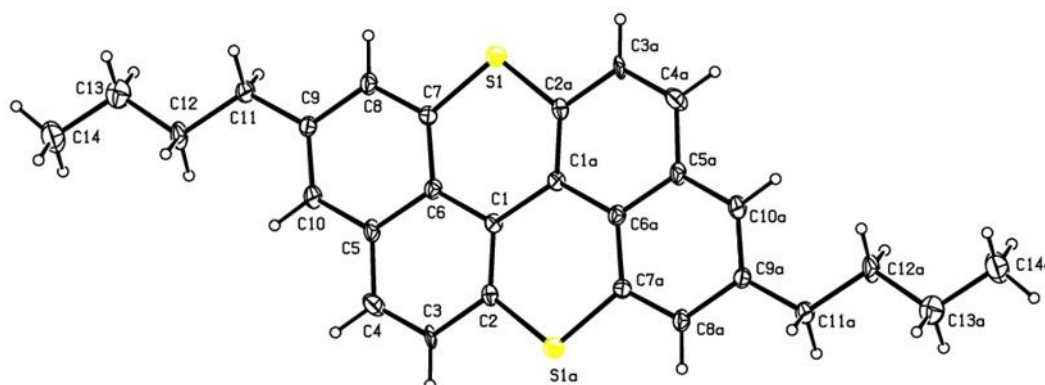

**Table S3.** Crystallographic information for the structural refinement of **SDA-2**

|                                    |                                                |
|------------------------------------|------------------------------------------------|
| Empirical formula                  | C <sub>28</sub> H <sub>26</sub> S <sub>2</sub> |
| Formula weight                     | 426.61                                         |
| Temperature/K                      | 293(2)                                         |
| Crystal system                     | triclinic                                      |
| Space group                        | P-1                                            |
| a/Å                                | 6.565(6)                                       |
| b/Å                                | 10.442(4)                                      |
| c/Å                                | 15.773(4)                                      |
| α/°                                | 96.93(3)                                       |
| β/°                                | 94.54(5)                                       |
| γ/°                                | 90.35(5)                                       |
| Volume/Å <sup>3</sup>              | 1070.0(10)                                     |
| Z                                  | 2                                              |
| ρ <sub>calc</sub> /cm <sup>3</sup> | 1.324                                          |
| μ/mm <sup>-1</sup>                 | 0.262                                          |
| F(000)                             | 452.0                                          |
| Crystal color                      | Clear orangish                                 |
| Crystal size/mm <sup>3</sup>       | 0.065 × 0.078 × 0.21                           |
| Radiation                          | Mo Kα (λ = 0.71073)                            |
| 2θ range for data collection/°     | 3.93 to 59.464                                 |
| Index ranges                       | -9 ≤ h ≤ 8, -11 ≤ k ≤ 13, -21 ≤ l ≤ 20         |

---

|                                                |                                                                  |
|------------------------------------------------|------------------------------------------------------------------|
| Reflections collected                          | 13806                                                            |
| Independent reflections                        | 4929 [ $R_{\text{int}} = 0.1372$ , $R_{\text{sigma}} = 0.2287$ ] |
| Data/restraints/parameters                     | 4929/0/273                                                       |
| Goodness-of-fit on $F^2$                       | 1.024                                                            |
| Final R indexes [ $I \geq 2\sigma(I)$ ]        | $R_1 = 0.1266$ , $wR_2 = 0.3023$                                 |
| Final R indexes [all data]                     | $R_1 = 0.2614$ , $wR_2 = 0.3740$                                 |
| Largest diff. peak/hole / $e \text{ \AA}^{-3}$ | 1.07/-0.82                                                       |

---

## 4. Polymerization Procedure

### General Methods for Kinetic Study and Analysis of Molecular Weight Growth<sup>3</sup>

A typical procedure of kinetics experiments were performed in glovebox using a [MMA]:[DBMM] ratio of 100:1 with 100 ppm **SDA-2** and 1 mL:1.5 mL MMA: DCM. To evaluate the kinetics and growth of molecular weight versus conversion for polymerization, an aliquot of 0.05 mL of reaction mixture was taken and injected into a solution of CDCl<sub>3</sub> containing 250 ppm of the radical inhibitor (BHT), at predetermined times after the start of the polymerization as indicated (when the reaction mixture was exposed to light). Another aliquot sample re-dissolved in HPLC grade, unstabilized tetrahydrofuran and the  $M_n$  and  $M_w/M_n$  were directly analyzed by GPC. Analysis of kinetics and molecular weight growth of other catalysts loading can be found in the supplementary details below.

### General Procedure for PMMA Macroinitiator Synthesis

A typical metal-free organocatalyzed ATRP procedures with the molar ratio of [MMA]<sub>0</sub>: [initiator]<sub>0</sub>: [catalyst]<sub>0</sub> = 100: 1: 0.01 were showed as follows. In Argon-filled glovebox, the polymerization was conducted with MMA (1.0 mL, 9.35 mmol, 100 eq.) as the model monomer, DBMM (18 μL, 93.5 μmol, 1.0 eq.) as the ATRP initiator, organic photocatalyst (4.70 μmol, 0.5 eq.) and DCM (1.0 mL) as the solvent in a Schlenk tube with a PTFE stirring bar. And then the polymerization was occurred under blue LED

irradiation at room temperature. After the desired time, the tube was opened under argon and 20.0  $\mu\text{L}$  of mixture were syringed out and quenched into  $\text{CDCl}_3$  containing 250 ppm BHT to determine the monomer conversion by  $^1\text{H}$  NMR. After  $^1\text{H}$  NMR analysis, the sample is dried using compressed air, re-dissolved in HPLC grade, unstabilized tetrahydrofuran and the  $M_n$  and  $M_w/M_n$  were directly analyzed by GPC.

### **Polymerization Procedure for Chain Extension from PMMA Macroinitiator**

MMA (2.00 mL, 18.8 mmol, 100 eq.), DBMM (72  $\mu\text{L}$ , 283  $\mu\text{mol}$ , 1.5 eq.), and catalyst (0.188  $\mu\text{mol}$ , 0.01 eq.) were dissolved in 2.50 mL DCM and reacted according to the above general polymerization procedure for 16 hours. After that, the tube was opened under argon and 20.0  $\mu\text{L}$  of mixture were syringed out and quenched into  $\text{CDCl}_3$  containing 250 ppm BHT to determine the monomer conversion by  $^1\text{H}$  NMR (Conv. = 70.4%). At this time, the reaction was removed, poured into 250 mL methanol and stirred for 4 h. The resulting precipitate was slowly dripped into room temperature methanol, after stirring for half an hour, then isolated by vacuum filtration and washed with excess methanol. The polymer was then re-dissolved in a minimal amount of DCM again and dripped into 150 mL of methanol and stirred for 2 h to fully remove unreacted monomer, initiator or catalyst. The resulting chain extended PMMA was collected via vacuum filtration and dried in a vacuum oven at 40  $^\circ\text{C}$  overnight obtained 1g of polymer,  $M_n = 6.1$  kDa,  $D = 1.26$ , and  $I^* = 92\%$ .

### **Chain Extension and Block Copolymer Synthesis from PMMA Macroinitiator**

### Synthesis of PMMA-*b*-PMMA

A Schlenk tube with a PTFE stirring bar was charged with 0.29 mg of PC ( $9.42 \times 10^{-5}$  mol, 0.02 eq.) and 26 mg of the PMMA macroinitiator described above ( $M_n = 6.1$  kDa, 1.0 eq.) which were dissolved in 1 mL of DCM. Then 91  $\mu$ L of MMA were added (0.86 mmol, 200 eq.), reacted according to the above general polymerization procedure for 6 hours. The tube was opened under argon and 20.0  $\mu$ L of mixture were syringed out and the sample is dried using compressed air, re-dissolved in HPLC grade, unstabilized tetrahydrofuran and the  $M_n$  and  $M_w/M_n$  were analyzed by GPC.

### Synthesis of PMMA-*b*-PTFEMA

A Schlenk tube with a PTFE stirring bar was charged with 50  $\mu$ L of PC ( $9.42 \times 10^{-5}$  mol, 0.05 eq.) and 34.2 mg of the PMMA macroinitiator described above ( $M_n = 6.1$  kDa, 1.0 eq.) which were dissolved in 1 mL of DCM. Then 132  $\mu$ L of TFEMA were added (1.12 mmol, 200 eq.), reacted according to the above general polymerization procedure for 9 hours. The tube was opened under argon and 20.0  $\mu$ L of mixture were syringed out and the sample is dried using compressed air, re-dissolved in HPLC grade, unstabilized tetrahydrofuran and the  $M_n$  and  $M_w/M_n$  were analyzed by GPC.



## General Procedure for PET-RAFT Polymerizations

A 10mL Schlenk tube is charged with PC (0.027  $\mu$ mol, 0.001 eq [5 ppm relative to monomer]), RAFT agent (0.027 mmol, 1 eq.), monomer (2.7 mmol, 100 eq.), and 0.5 mL solvent. This stoichiometry was used in all experiments unless otherwise indicated. And then the polymerization was placed under a 460 nm blue bulb or 516 nm green bulb. After the indicated amount of reaction time, the reaction mixture is removed from the photoreactor and samples of the reaction mixture are removed via syringe for analysis.<sup>4</sup>

**Table S4.** Initiator screening for O-ATPR of MMA

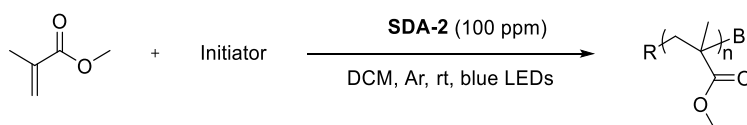

| Entry | Initiator | Time (h) | Conv. (%) <sup>b</sup> | $M_{n,theo}$ <sup>c</sup> | $M_{n,GPC}$ <sup>d</sup> | $\bar{D}$ <sup>d</sup> | $I^*$ (%) <sup>e</sup> |
|-------|-----------|----------|------------------------|---------------------------|--------------------------|------------------------|------------------------|
| 1     | BEB       | 17       | 86                     | 8.8                       | 183.0                    | 1.80                   | 52                     |
| 2     | EBP       | 15       | 80                     | 8.3                       | 7.8                      | 1.40                   | 106                    |
| 3     | EBiB      | 16       | 83                     | 8.5                       | 18.4                     | 1.66                   | 46                     |
| 4     | BrPN      | 16       | 92                     | 9.4                       | 14.0                     | 1.22                   | 67                     |
| 5     | DBM       | 16       | 85                     | 8.8                       | 10.0                     | 1.35                   | 88                     |
| 6     | DBM       | 16       | 84                     | 8.7                       | 10.8                     | 1.30                   | 81                     |
| 7     | DBMM      | 20       | 88                     | 9.1                       | 10.0                     | 1.30                   | 91                     |

<sup>a</sup>Reaction conditions:  $[M]=9.4$  mol/L,  $[MMA]_0/[DBMM]_0/[SDA-2]_0 = 1000 : 10 : 0.1$ , MMA/DCM (1:1, v/v) at room temperature under blue LED irradiation for specified time. <sup>b</sup>Determined by <sup>1</sup>H NMR.  $M_{n,theo} = ([monomer]/[initiator] \times M_w \text{ of monomer} \times \text{Conv. \%} + M_w \text{ of initiator})/1000$ . <sup>d</sup>Measured using GPC-MALS. <sup>e</sup> $I^* = (M_{n,theo})/(M_{n,GPC}) \times 100\%$ .

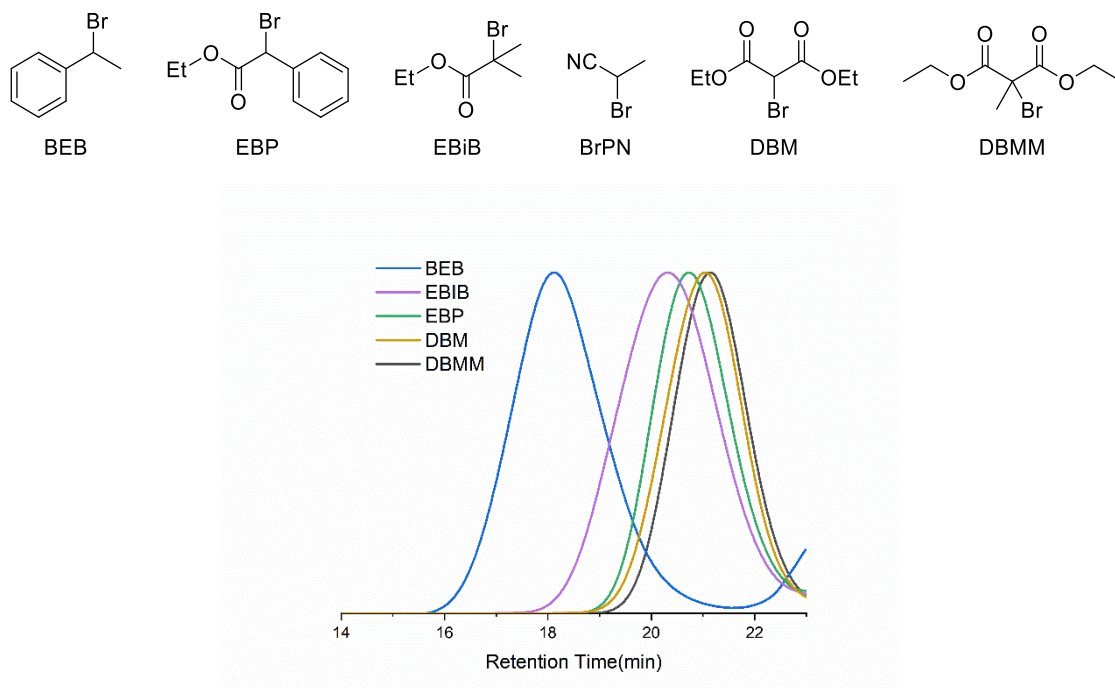

**Figure S10.** GPC traces of entry 1 (blue), 2 (red), 3 (purple), 6 (yellow) and 7 (black).

**Table S5.** Results of O-ATRP catalyzed by various **SDA-2** loading under various light source.

| SDA-2 loading (ppm) | Light Source | Conv. <sup>b</sup> | $M_{n,theo}^c$ | $M_{n,GPC}^d$ | $\bar{D}^d$ | $I^{*e}$ (%) |
|---------------------|--------------|--------------------|----------------|---------------|-------------|--------------|
| 100                 | Blue LEDs    | 76%                | 7.9            | 9.3           | 1.25        | 85           |
| 50                  | Blue LEDs    | 88%                | 9.1            | 9.7           | 1.29        | 91           |
| 30                  | Blue LEDs    | 87%                | 8.9            | 9.6           | 1.45        | 94           |
| 25                  | Blue LEDs    | 96%                | 9.9            | 10.8          | 1.43        | 77           |
| 10                  | Blue LEDs    | 88%                | 9.1            | 10.7          | 1.40        | 93           |
| 5                   | Blue LEDs    | 89%                | 9.2            | 10.5          | 1.54        | 92           |
| 100                 | Green LEDs   | 75%                | 7.8            | 9.9           | 1.25        | 79           |
| 50                  | Green LEDs   | 71%                | 7.5            | 10.1          | 1.44        | 74           |
| 100                 | White LEDs   | 64%                | 6.7            | 9.8           | 1.38        | 68           |
| 100                 | Sunlight     | 68%                | 7.1            | 13.6          | 1.27        | 52           |

<sup>a</sup>Polymerization conditions:  $[M] = 9.4 \text{ mol/L}$ ,  $[M]_0/[DBMM]_0 = 100/1$ . <sup>b</sup>Determined by  $^1\text{H NMR}$ . <sup>c</sup>Calculated by  $([\text{monomer}]_0/[\text{initiator}]_0 \times \text{MW of monomer} \times \text{conv. \%} + \text{MW of initiator})/1000$ . <sup>d</sup>Molecular weight ( $M_{n,GPC}$ ) and dispersity ( $\bar{D}$ ) were measured by GPC with poly(methyl methacrylate) (PMMA) standards. <sup>e</sup>Initiator efficiency ( $I^*$ ) calculated by  $(M_{n,theo}/M_{n,GPC}) \times 100\%$ .

## Monomer scope in O-ATRP

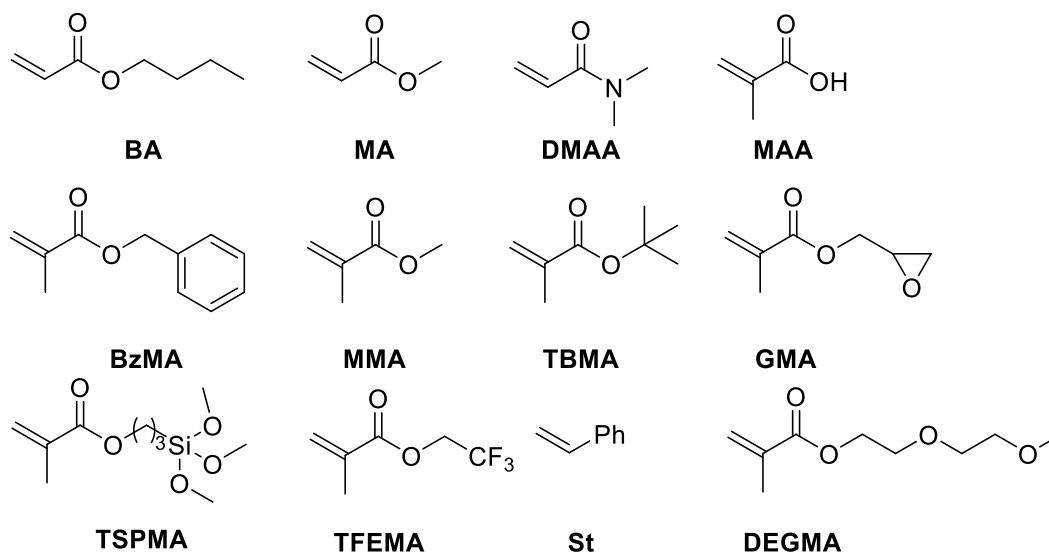

**Table S6.** Data of  $M_n$  and  $D$  vs Conversion, corresponding to **Figure 2A** left blue line.

| Entry | catalyst | initiator | $M_0/I_0/C_0^a$ | time (h) | conv. (%) <sup>b</sup> | $M_{n,GPC}^c$ | $D^c$ |
|-------|----------|-----------|-----------------|----------|------------------------|---------------|-------|
| 1     | SDA-2    | DBMM      | 200:1:0.01      | 1        | 27                     | 5.6           | 1.34  |
| 2     | SDA-2    | DBMM      | 200:1:0.01      | 3        | 43                     | 10.3          | 1.33  |
| 3     | SDA-2    | DBMM      | 200:1:0.01      | 5        | 50                     | 11.1          | 1.33  |
| 4     | SDA-2    | DBMM      | 200:1:0.01      | 7        | 75                     | 13.8          | 1.31  |

<sup>a</sup> $M_0/I_0/C_0 = [\text{monomer}]_0/[\text{initiator}]_0/[\text{catalyst}]_0$ . <sup>b</sup>Determined by <sup>1</sup>H NMR. <sup>c</sup>Determined by GPC with poly(methyl methacrylate) (PMMA) standards, kDa.

**Table S7.** Investigations on O-ATRP of more monomers under blue light

| Entry | M     | Solvent | Time (h) | conv. (%) <sup>b</sup> | $M_{n,th}$ <sup>c</sup> | $M_{n,GPC}$ <sup>d</sup> | $\bar{D}$ <sup>d</sup> |
|-------|-------|---------|----------|------------------------|-------------------------|--------------------------|------------------------|
| 1     | MA    | THF     | 8        | 92.7                   | 8.1                     | 9.0                      | 1.48                   |
| 2     | BA    | THF     | 8        | 87.1                   | 11.3                    | 11.5                     | 1.52                   |
| 3     | GMA   | THF     | 11       | 77.6                   | 11.2                    | 11.2                     | 1.50                   |
| 4     | DEGMA | THF     | 11       | 81.1                   | 15.3                    | 16.1                     | 1.51                   |

<sup>a</sup> $[M]_0/[EBP]_0/[SDA-2]_0 = 100/1/0.01$ . <sup>b</sup>Determined by <sup>1</sup>H NMR. <sup>c</sup>Calculated by  $(Conv. \times [MMA]_0/[DBMM]_0)$

$\times MW_{MMA} + MW_{DBMM}$ . <sup>d</sup>Determined by GPC with poly(methyl methacrylate) (PMMA) standards, kg/mol.

## Gel-Permeation Chromatography Traces

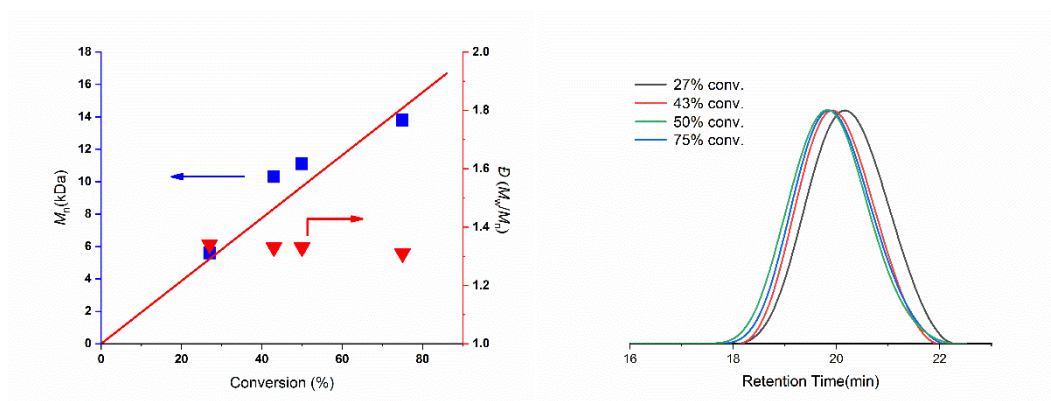

**Figure S11.** (a) Plot of  $M_n$  and  $\bar{D}$  versus monomer conversion for the polymerization of MMA under continuous irradiation; (b) Overlaid GPC trace for the O-ATRP of MMA using **SDA-2** under 6W blue LED irradiation.

## NMR Spectra of Precipitated Polymer Products

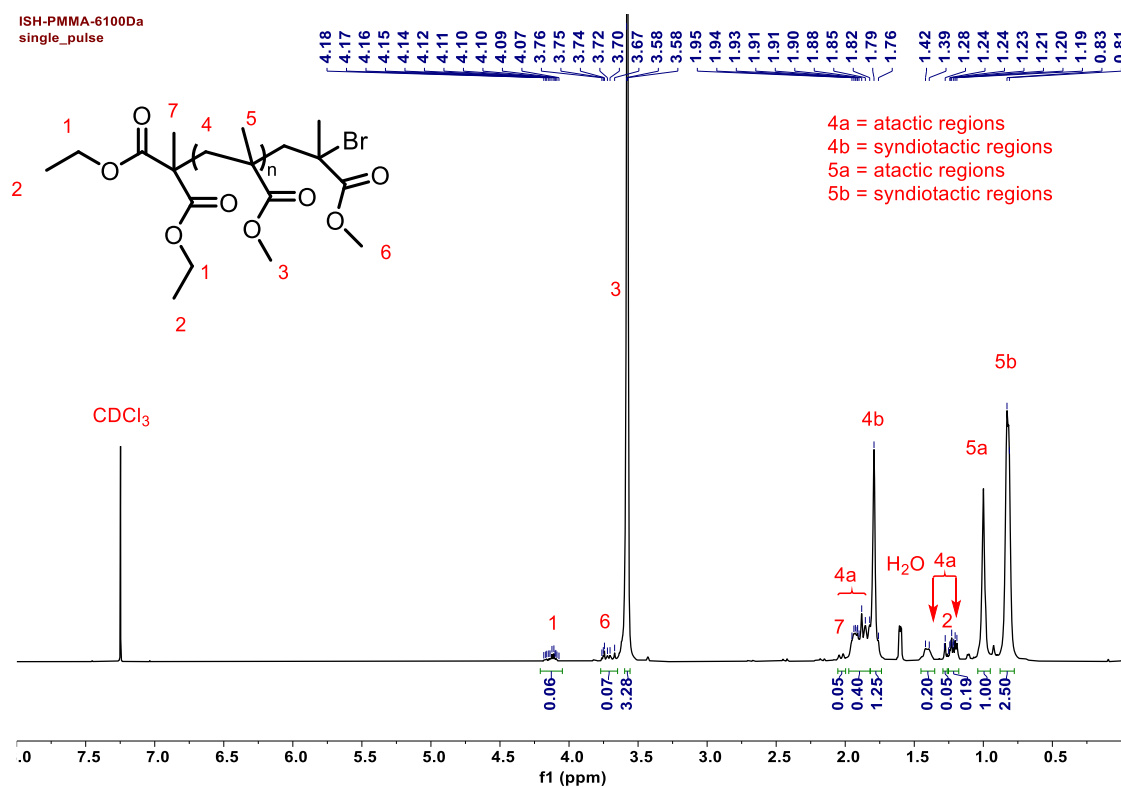

**Figure S12.** <sup>1</sup>H NMR of isolated PMMA (CDCl<sub>3</sub>, 400 MHz, DP = 65,  $M_{n(\text{NMR})}$  = 6.76 kDa).

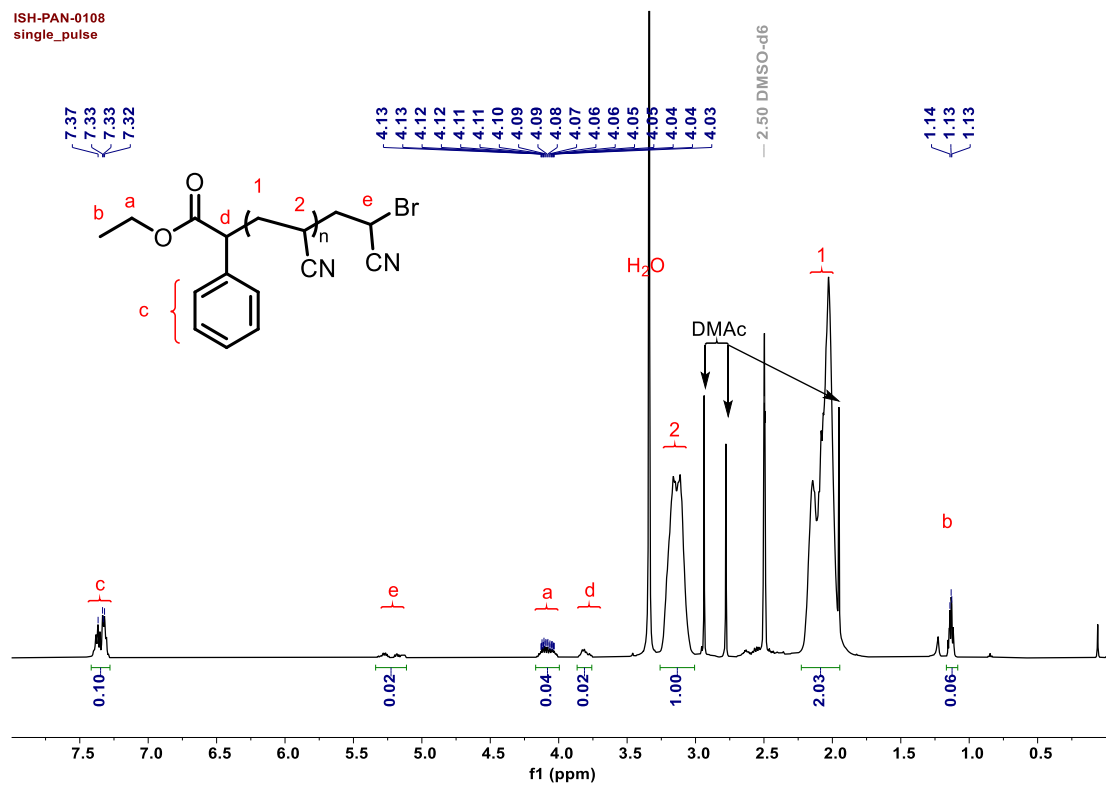

**Figure S13.** <sup>1</sup>H NMR of isolated PAN (DMSO-*d*<sub>6</sub>, 500 MHz, DP = 50,  $M_{n(\text{NMR})}$  = 2.89 kDa).

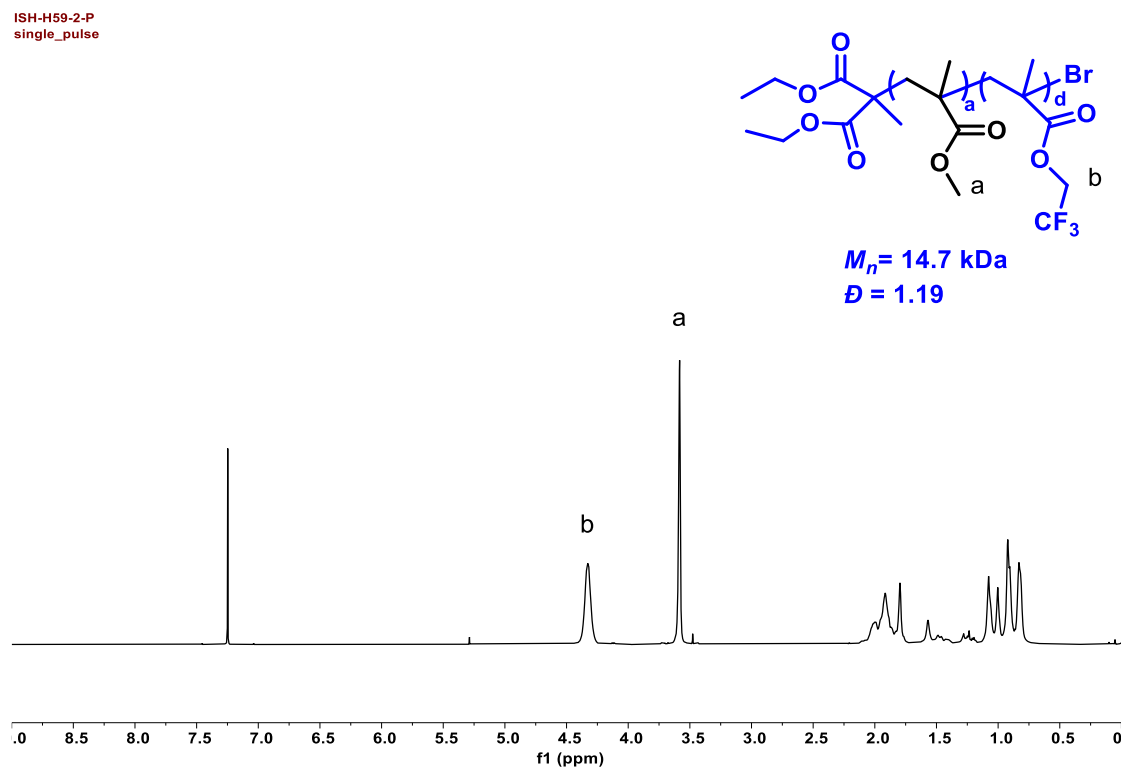

ISH-H59-2-P  
single\_pulse

--73.18

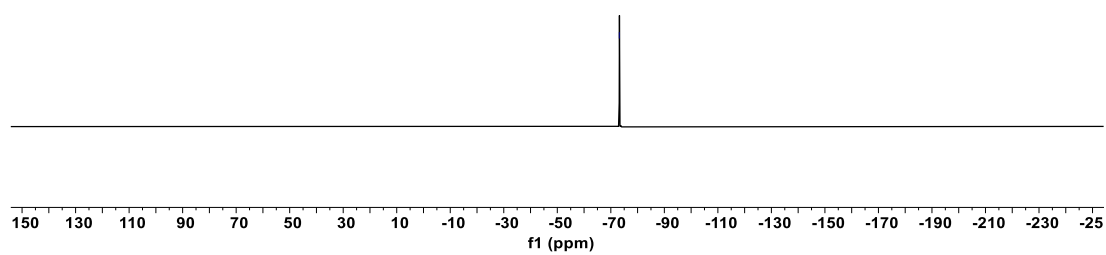

**Figure S14.** <sup>1</sup>H NMR and <sup>19</sup>F spectrum of isolated PMMA-*b*-TFEMA prepared by O-ATRP using **SDA-3** (50 ppm) as the catalyst. (CDCl<sub>3</sub>)

## 5. NMR Spectra

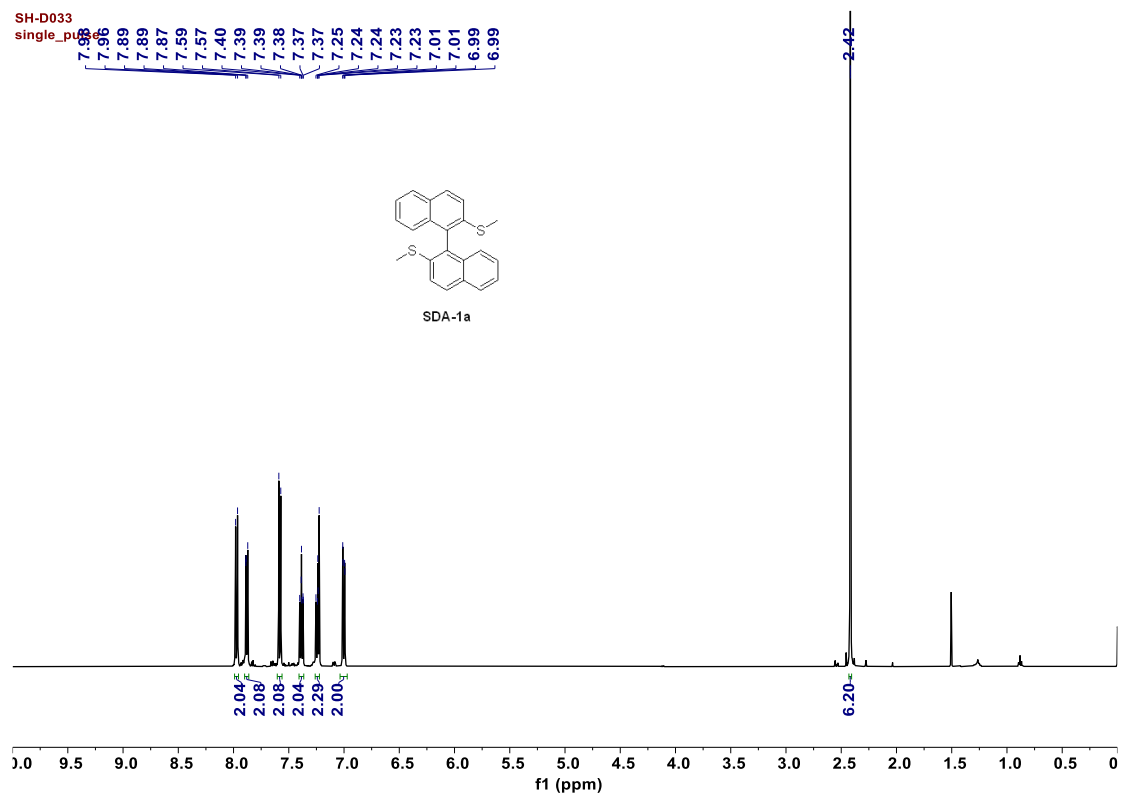

Figure S15.  $^1\text{H}$  NMR of SDA-1a in  $\text{CDCl}_3$ .

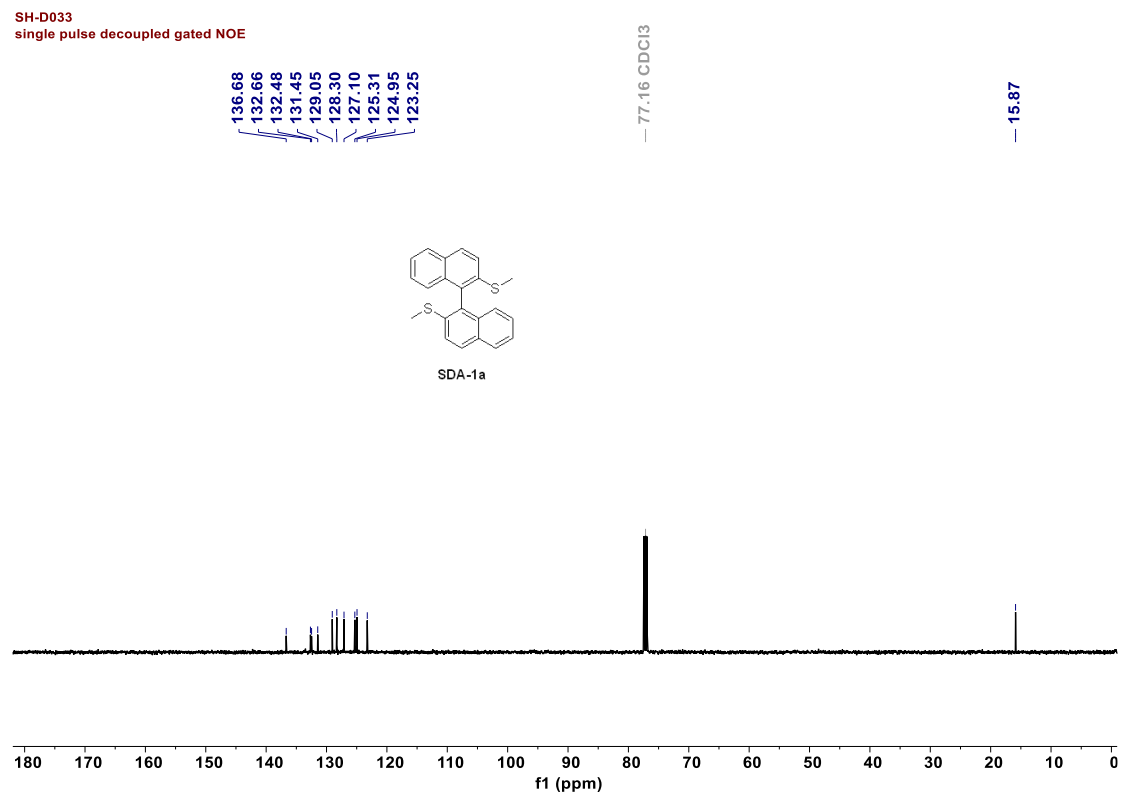

Figure S16.  $^{13}\text{C}$  NMR of SDA-1a in  $\text{CDCl}_3$ .



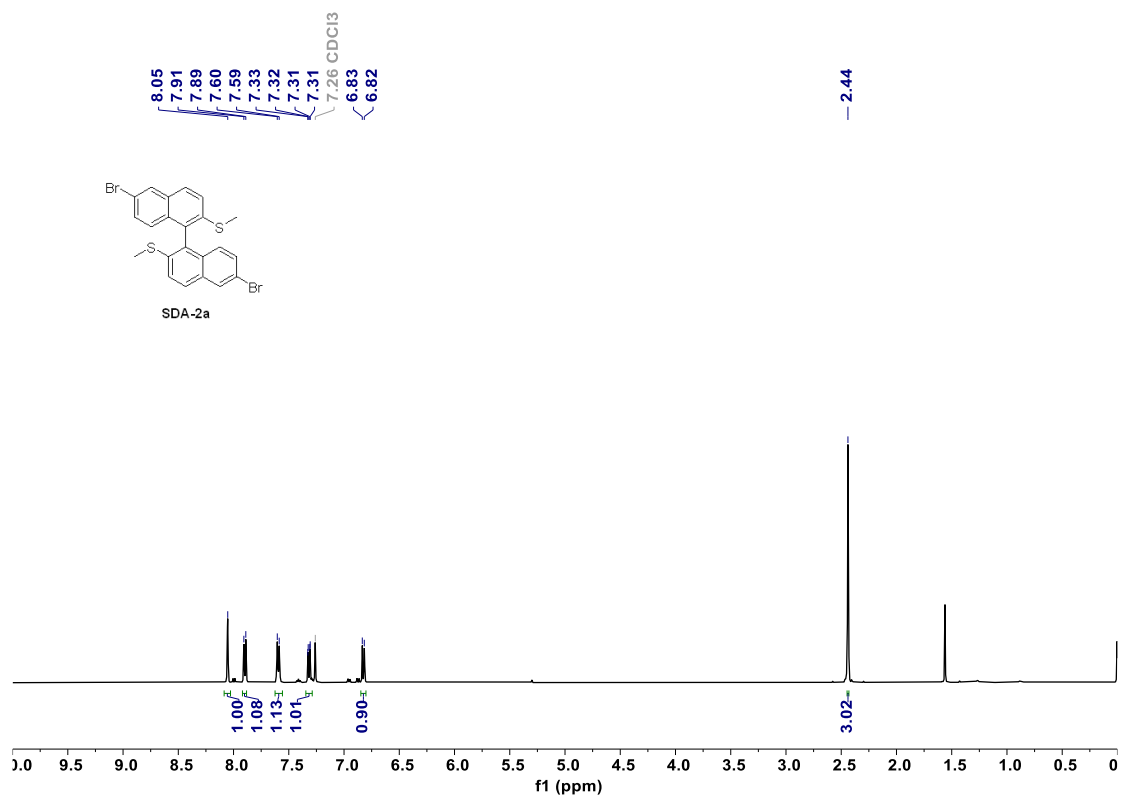

Figure S17. <sup>1</sup>H NMR of SDA-2a in CDCl<sub>3</sub>.

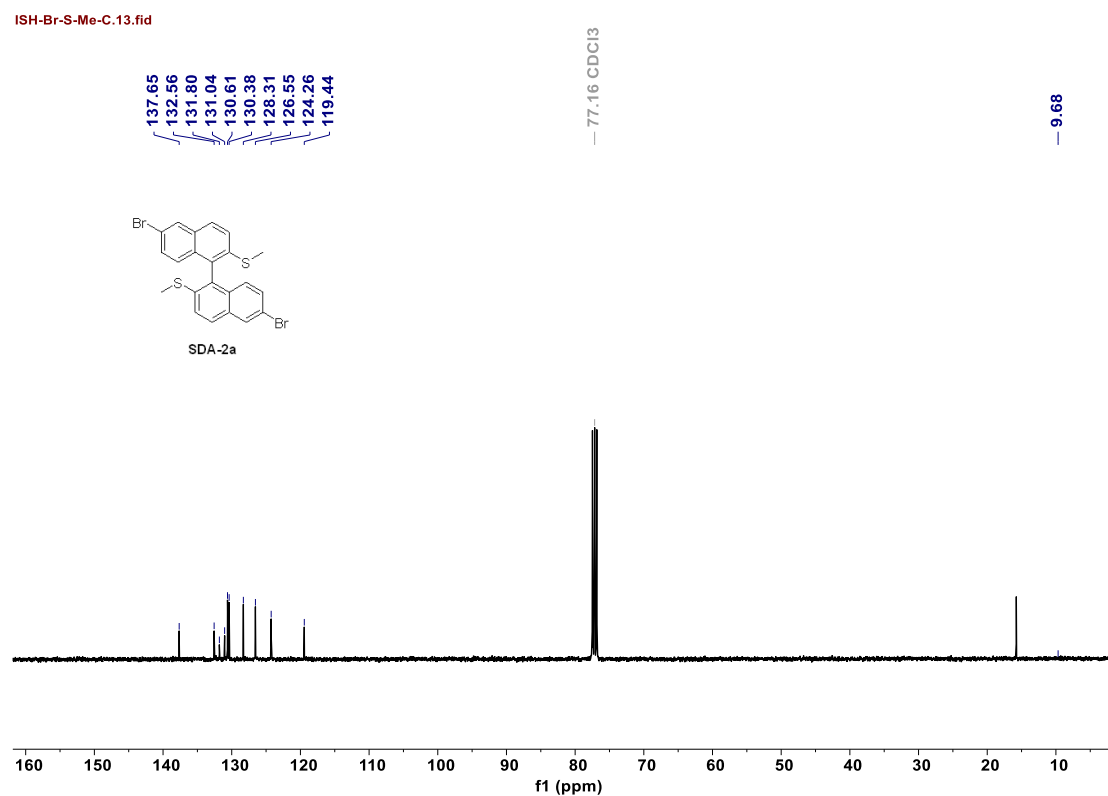

Figure S18. <sup>13</sup>C NMR of SDA-2a in CDCl<sub>3</sub>.

ISH-NBU-ETHER-1227-C.1.fid

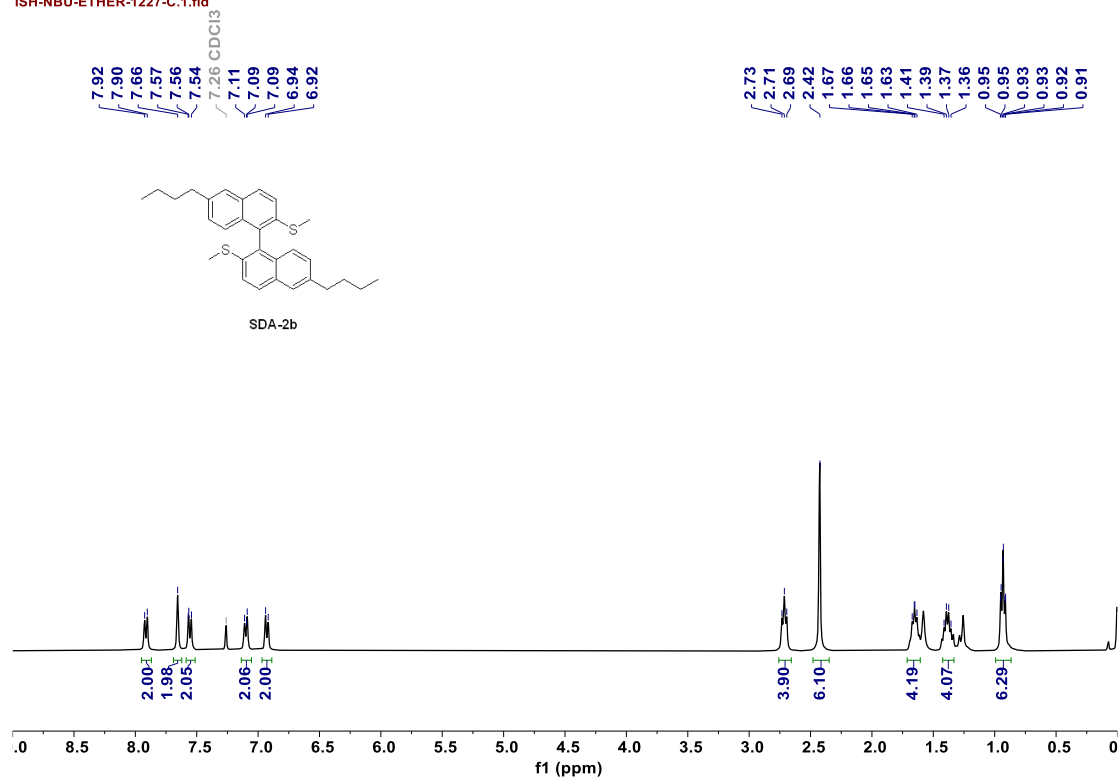

Figure S19. <sup>1</sup>H NMR of SDA-2b in CDCl<sub>3</sub>.

ISH-NBU-ETHER-1227-C.13.fid

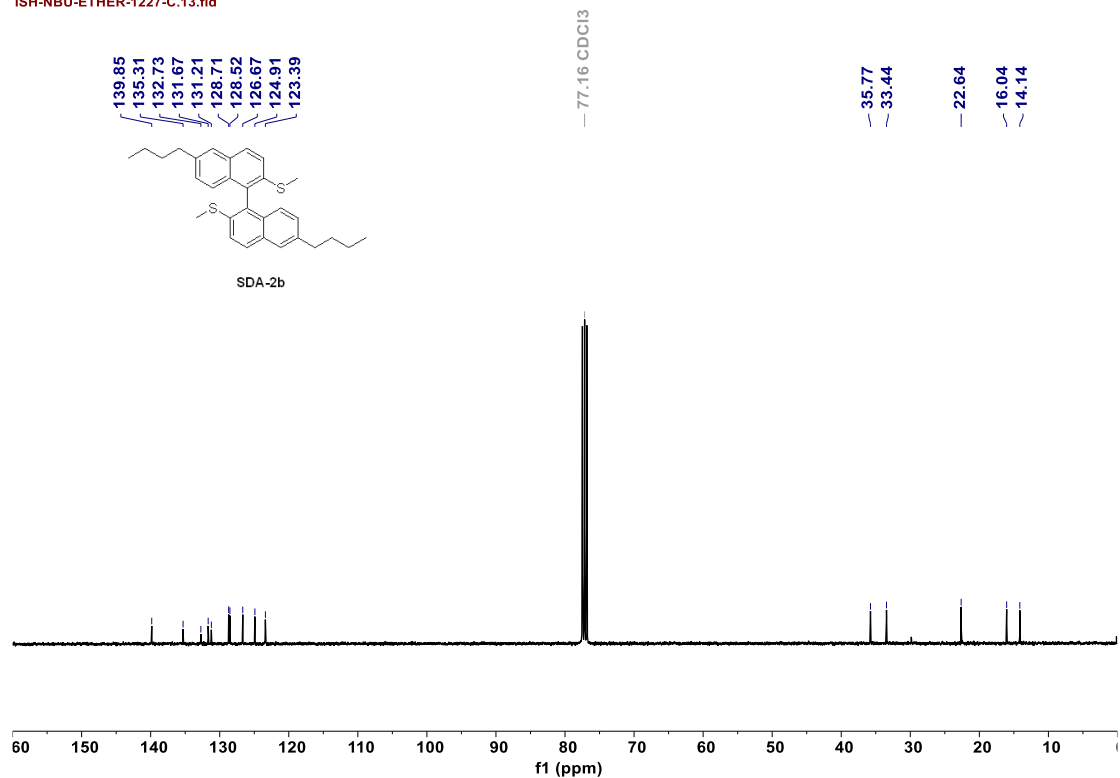

Figure S20. <sup>13</sup>C NMR of SDA-2b in CDCl<sub>3</sub>.

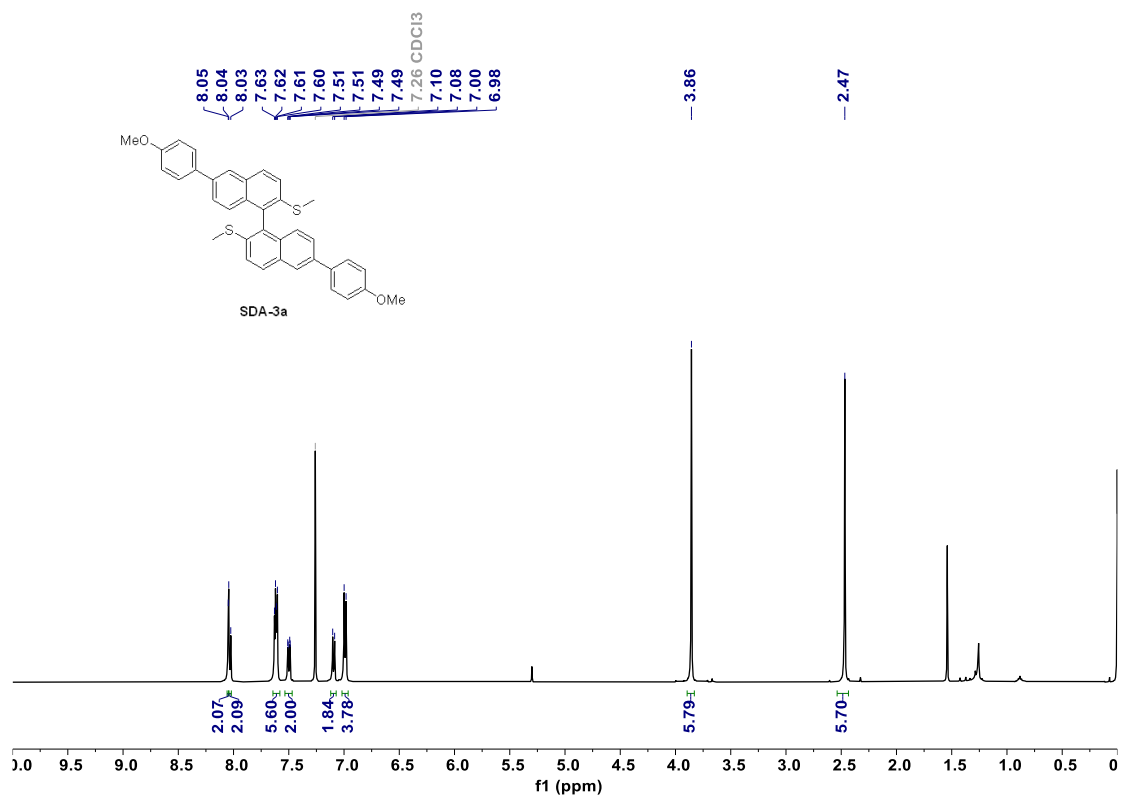

Figure S21. <sup>1</sup>H NMR of SDA-3a in CDCl<sub>3</sub>.

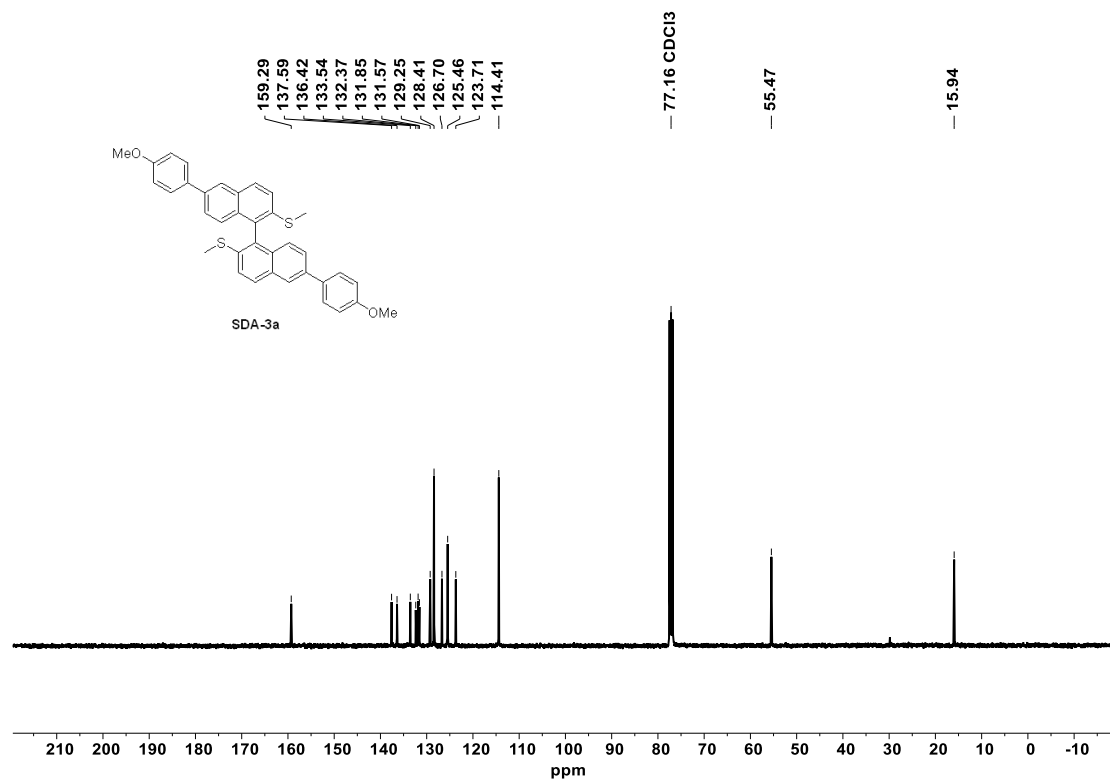

Figure S22. <sup>13</sup>C NMR of SDA-3a in CDCl<sub>3</sub>.

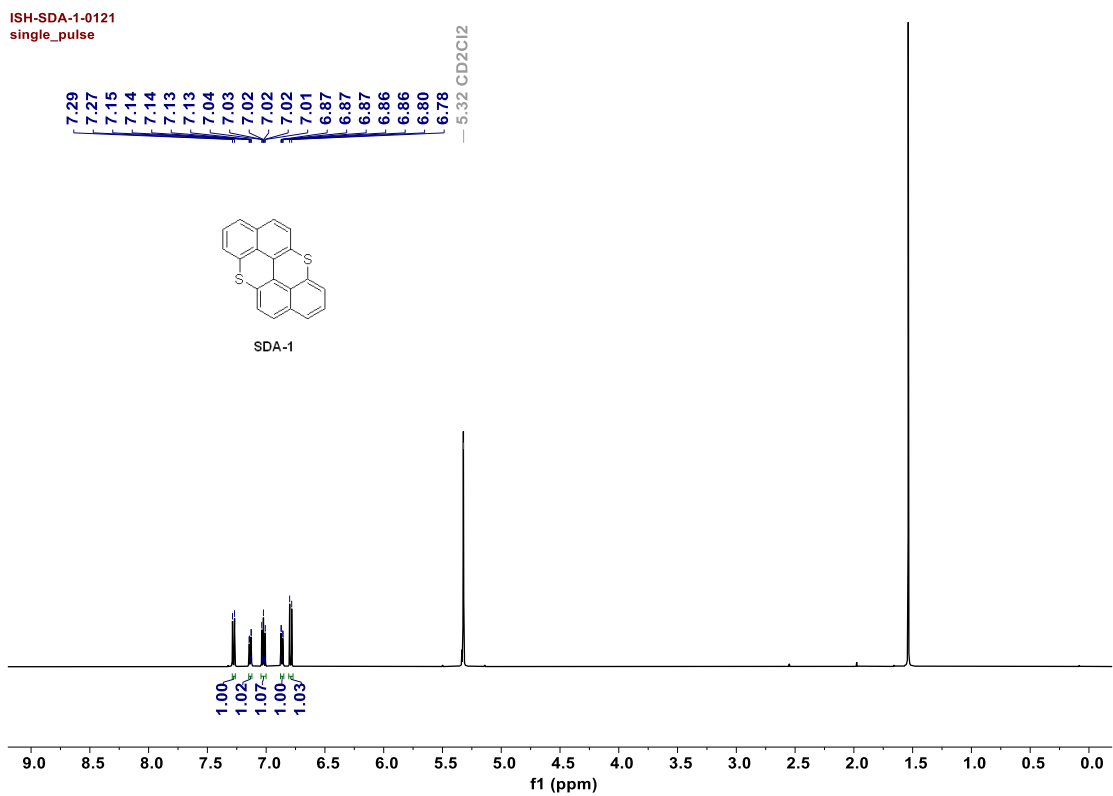

Figure S23. <sup>1</sup>H NMR of SDA-1 in CD<sub>2</sub>Cl<sub>2</sub>.

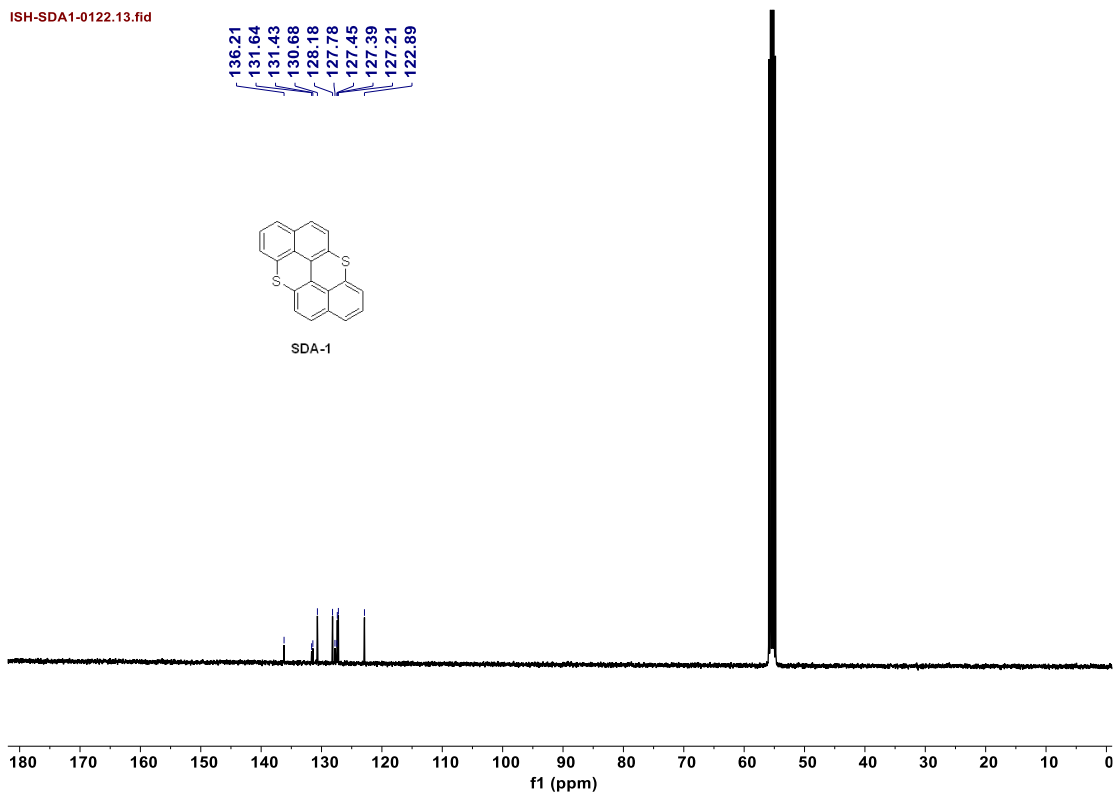

Figure S24. <sup>13</sup>C NMR of SDA-1 in CD<sub>2</sub>Cl<sub>2</sub>.

ISH-PTT3-0922-C  
single\_pulse

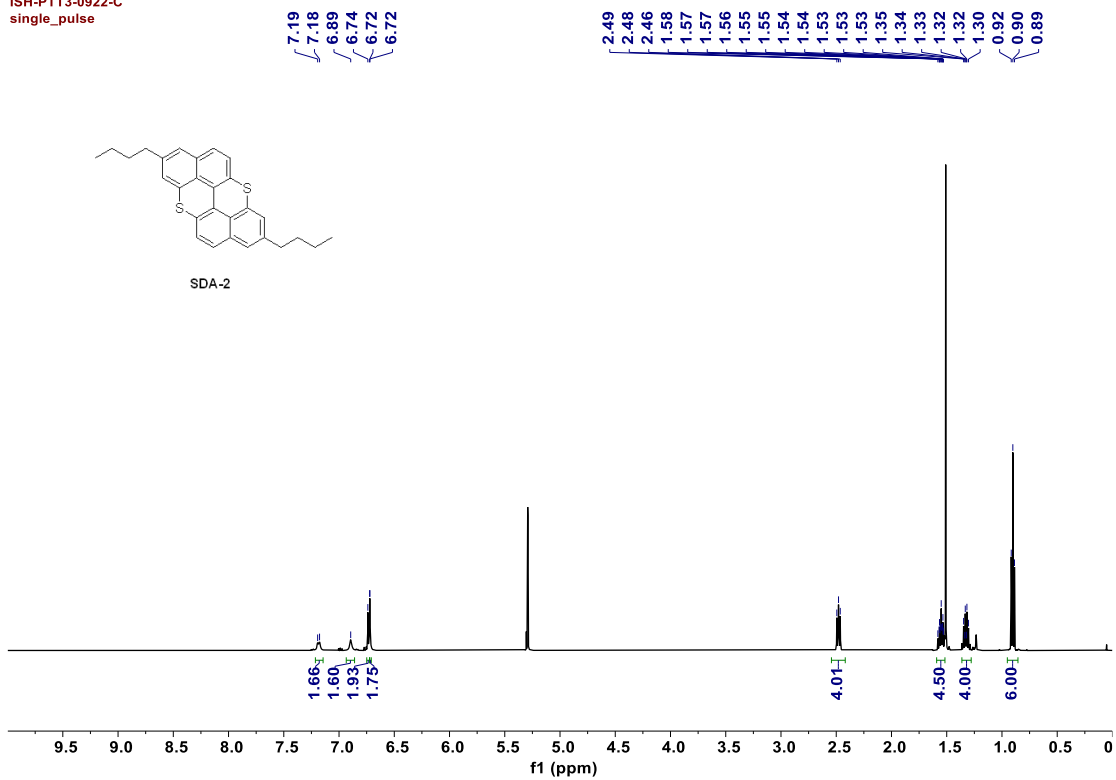

Figure S25. <sup>1</sup>H NMR of SDA-2 in CDCl<sub>3</sub>.

ISH-PTT3-0922-C  
single pulse decoupled gated NOE

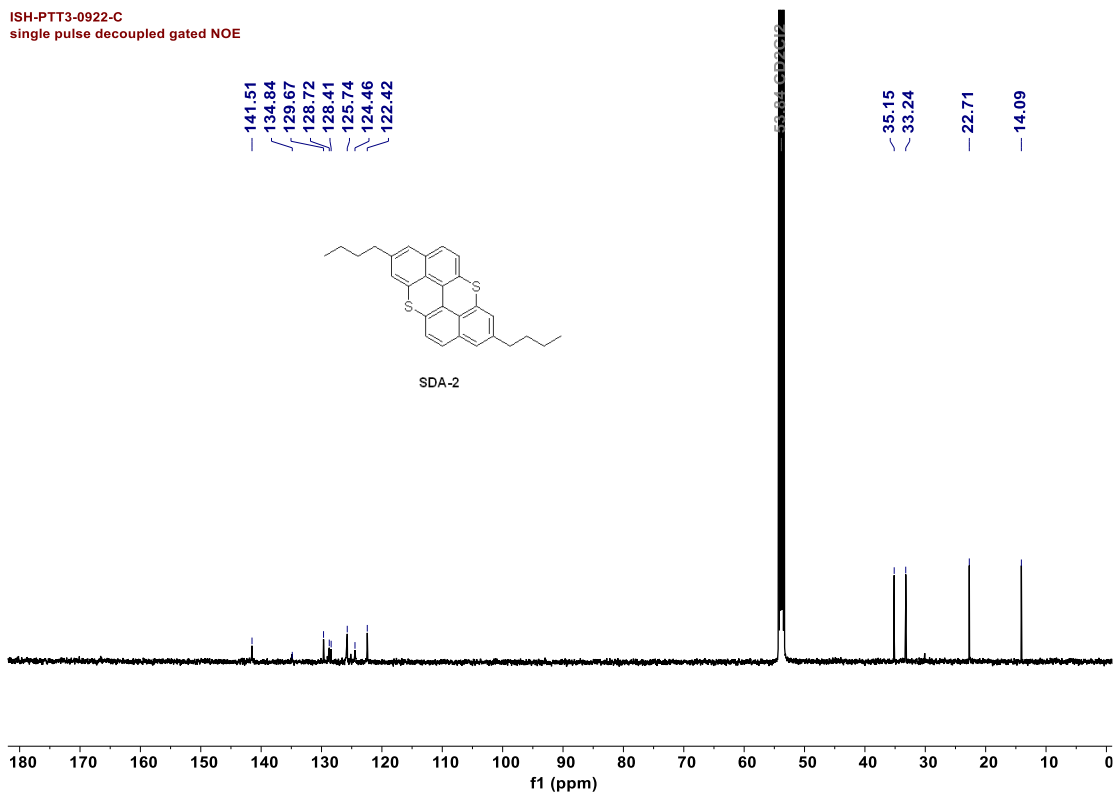

Figure S26. <sup>13</sup>C NMR of SDA-2 in CD<sub>2</sub>Cl<sub>2</sub>.

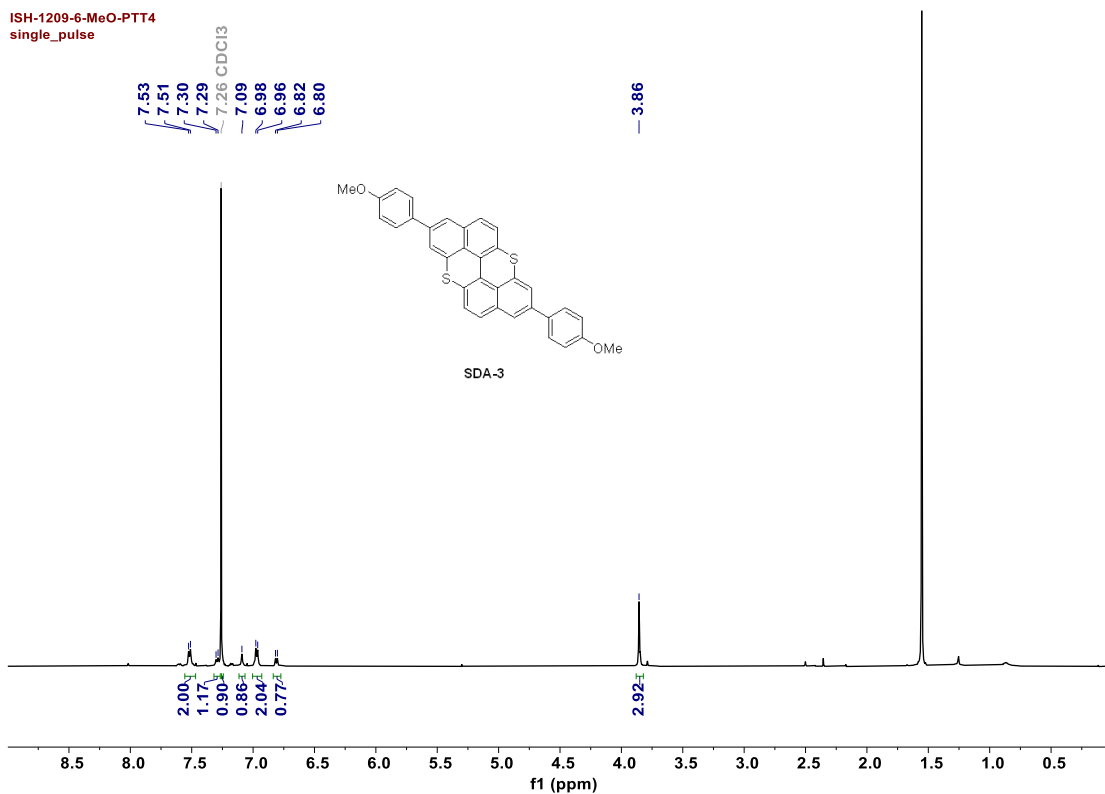

Figure S27.  $^1\text{H}$  NMR of SDA-3 in  $\text{CDCl}_3$ .

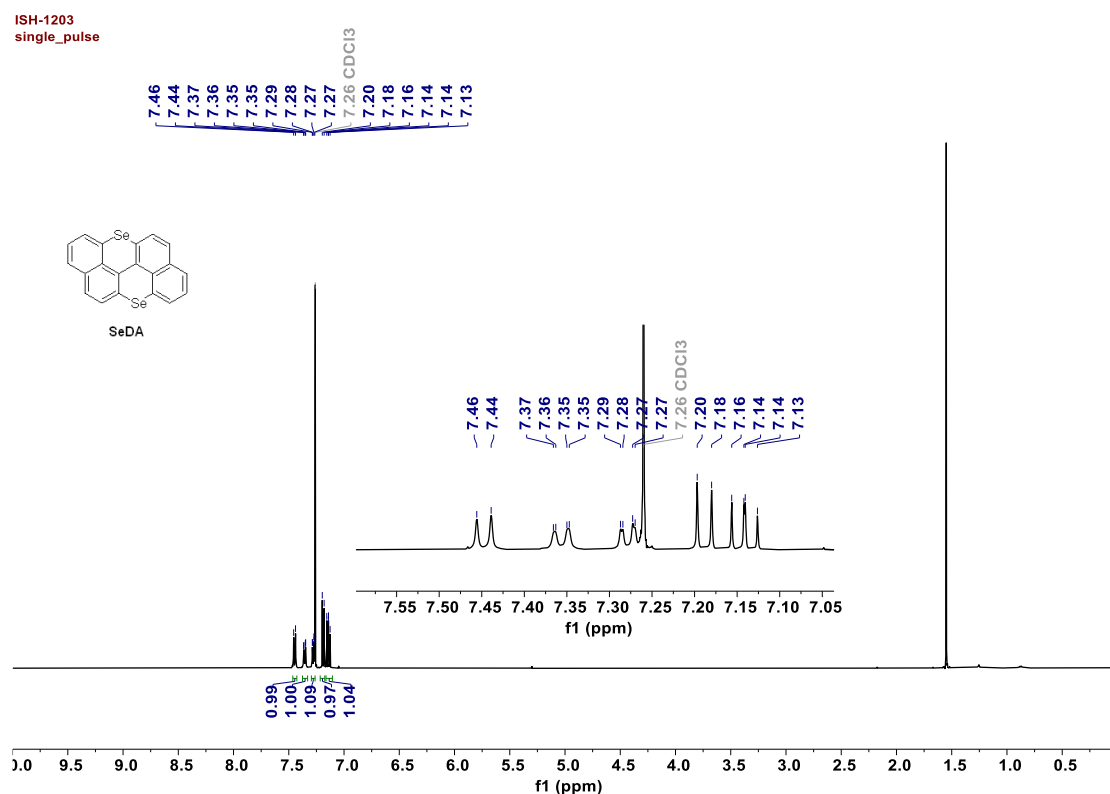

Figure S28.  $^1\text{H}$  NMR of SeDA in  $\text{CDCl}_3$ .

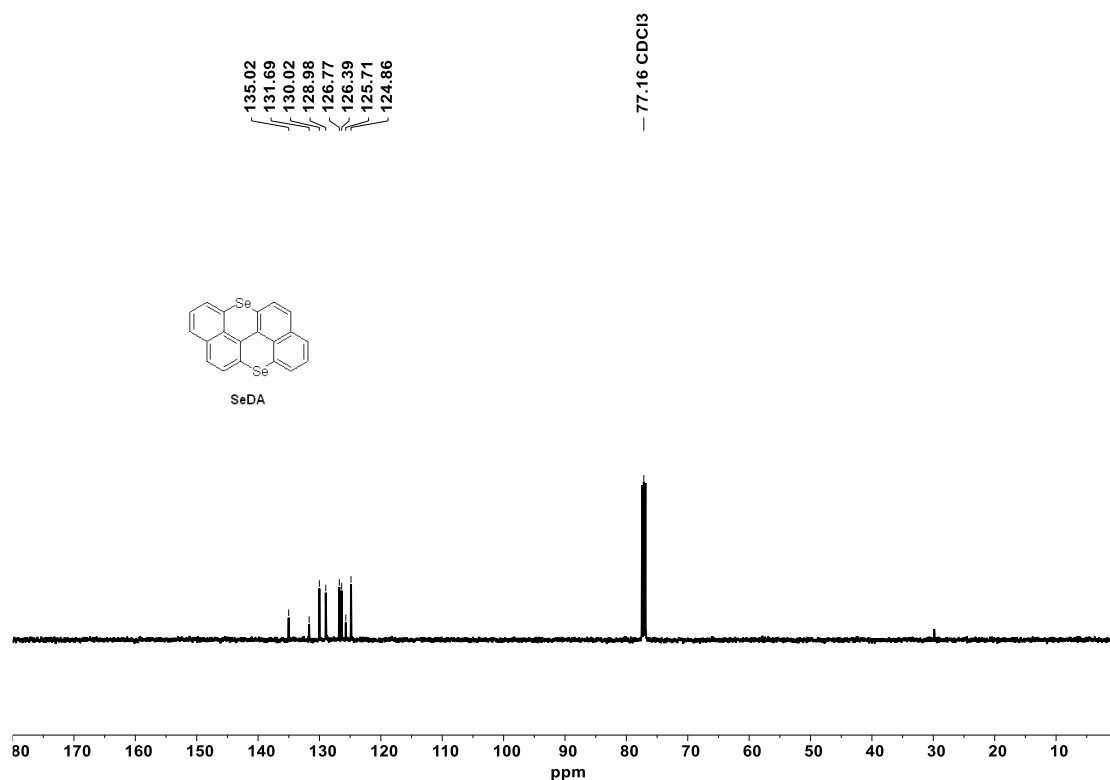

Figure S29. <sup>13</sup>C NMR of SeDA in CDCl<sub>3</sub>.

## 6. Computational detail

All of the theoretical calculations were performed in Gaussian16 package. Geometries optimization calculations were carried out by a hybrid functional PBE0 with 6-31G\* basis set for all atoms. Vibrational frequencies were calculated analytically at the same level to obtain the thermodynamic corrections. No imaginary frequency was obtained at optimized geometries for all species. The DCM solvation model using the self-consistent reaction field (SCRF) method with the solvents of acetonitrile was employed to account the solvent effect. The changes in Gibbs free energy are reported in the content. The redox potentials of triplet state were calculated by the energy differences of triplet states and cation radical,

$$\Delta G_{\text{red}}(\text{PC}^+/\text{}^3\text{PC}) = G(\text{}^3\text{PC}) - G(\text{PC}^+),$$

with the corrections to SHE (−4.48V) and to SCE (−0.244V) in acetonitrile,

$$E^0(\text{PC}^+/\text{}^3\text{PC}) = \Delta G_{\text{red}}(\text{PC}^+/\text{}^3\text{PC})/23.06 - 4.48 - 0.244, \text{ in V.}$$

## Computational geometries and energies

SDA-1, R=H

Triplet state

|   |           |           |           |
|---|-----------|-----------|-----------|
| C | -2.457745 | -2.561898 | -0.404639 |
| C | -1.128673 | -2.889426 | -0.211004 |
| C | -0.178851 | -1.907198 | 0.048622  |
| C | -0.500265 | -0.489486 | 0.054585  |
| C | -1.929246 | -0.174809 | -0.023883 |
| C | -2.885465 | -1.209953 | -0.272271 |
| C | 0.500263  | 0.489480  | 0.054579  |
| C | 1.929245  | 0.174810  | -0.023889 |
| C | 2.433844  | -1.126236 | 0.143733  |
| C | 3.800827  | -1.416357 | 0.071915  |
| H | 4.142531  | -2.438910 | 0.208416  |
| C | 4.710031  | -0.398391 | -0.187950 |
| C | 4.254058  | 0.899167  | -0.358921 |
| C | 2.885457  | 1.209955  | -0.272279 |
| H | -3.193691 | -3.330190 | -0.621007 |
| H | -0.815097 | -3.929780 | -0.252741 |
| C | 2.457728  | 2.561896  | -0.404692 |
| C | 1.128654  | 2.889421  | -0.211062 |
| C | -2.433840 | 1.126238  | 0.143732  |
| C | -3.800819 | 1.416375  | 0.071883  |
| C | -4.710025 | 0.398416  | -0.187999 |
| C | 0.178843  | 1.907195  | 0.048606  |
| C | -4.254060 | -0.899149 | -0.358943 |
| H | -4.142509 | 2.438933  | 0.208375  |
| H | -4.955779 | -1.705925 | -0.554517 |
| H | 0.815064  | 3.929770  | -0.252825 |
| H | 3.193670  | 3.330182  | -0.621094 |
| H | 4.955769  | 1.705950  | -0.554495 |
| S | -1.394364 | 2.482074  | 0.519657  |
| S | 1.394381  | -2.482097 | 0.519573  |



H -5.770879 0.622463 -0.254311  
H 5.770888 -0.622434 -0.254230  
Energies (0K) = -1563.347555  
Energies (0K) + ZPE = -1563.113384  
Enthalpies (298K) = -1563.097338  
Free Energies (298K) = -1563.156312

Cation radical

C 2.527302 -2.556608 -0.000576  
C 1.209480 -2.891745 -0.000450  
C 0.216652 -1.884086 -0.000169  
C 0.525682 -0.502763 -0.000115  
C 1.928289 -0.166226 -0.000069  
C 2.923433 -1.194932 -0.000307  
C -0.525697 0.502764 -0.000157  
C -1.928309 0.166223 -0.000156  
C -2.417473 -1.164492 0.000279  
C -3.780665 -1.458963 0.000685  
H -4.106637 -2.495678 0.001105  
C -4.720811 -0.434587 0.000501  
C -4.292838 0.879549 -0.000112  
C -2.923460 1.194950 -0.000405  
H 3.293329 -3.326557 -0.000826  
H 0.906672 -3.935233 -0.000548  
C -2.527291 2.556620 -0.000857  
C -1.209477 2.891749 -0.000711  
C 2.417499 1.164502 0.000273  
C 3.780662 1.458944 0.000430  
C 4.720838 0.434545 0.000207  
C -0.216640 1.884078 -0.000234  
C 4.292850 -0.879546 -0.000176  
H 4.106660 2.495659 0.000696  
H 5.010110 -1.695369 -0.000355  
H -0.906665 3.935236 -0.000955

|   |           |           |           |
|---|-----------|-----------|-----------|
| H | -3.293324 | 3.326566  | -0.001287 |
| H | -5.010169 | 1.695307  | -0.000339 |
| S | 1.374211  | 2.542910  | 0.000656  |
| S | -1.374220 | -2.542900 | 0.000222  |
| H | 5.779759  | 0.672587  | 0.000330  |
| H | -5.779757 | -0.672537 | 0.000838  |

Energies (0K) = -1563.235387

Energies (0K) + ZPE = -1562.997428

Enthalpies (298K) = -1562.981726

Free Energies (298K) = -1563.039776

### SDA-2, R=n-Bu

#### Triplet state

|   |           |           |           |
|---|-----------|-----------|-----------|
| C | 2.031008  | -2.790300 | 0.507545  |
| C | 0.724601  | -2.940312 | 0.080612  |
| C | -0.051459 | -1.836267 | -0.257970 |
| C | 0.426865  | -0.471292 | -0.111196 |
| C | 1.846774  | -0.341785 | 0.218014  |
| C | 2.625959  | -1.496109 | 0.541874  |
| C | -0.440311 | 0.623836  | -0.202991 |
| C | -1.886451 | 0.485466  | -0.379024 |
| C | -2.504417 | -0.730693 | -0.715675 |
| C | -3.886549 | -0.849106 | -0.887851 |
| H | -4.313466 | -1.814732 | -1.150900 |
| C | -4.723697 | 0.252378  | -0.714620 |
| C | -4.137234 | 1.469768  | -0.381570 |
| C | -2.749559 | 1.614678  | -0.221086 |
| H | 2.627178  | -3.654678 | 0.783958  |
| H | 0.293769  | -3.935466 | -0.002011 |
| C | -2.199887 | 2.896109  | 0.071816  |
| C | -0.828641 | 3.065879  | 0.124054  |
| C | 2.520669  | 0.891381  | 0.232696  |

|   |            |           |           |
|---|------------|-----------|-----------|
| C | 3.878062   | 1.001677  | 0.546411  |
| C | 4.627983   | -0.126774 | 0.877321  |
| C | 0.035469   | 1.988437  | -0.043344 |
| C | 3.984889   | -1.360442 | 0.870405  |
| H | 4.351180   | 1.981356  | 0.545075  |
| H | 4.546468   | -2.258676 | 1.119950  |
| C | -6.216180  | 0.111311  | -0.829199 |
| C | -6.870049  | -0.229438 | 0.514646  |
| H | -6.457682  | -0.674094 | -1.556706 |
| H | -6.645343  | 1.046444  | -1.211294 |
| C | -8.384450  | -0.375711 | 0.414300  |
| H | -6.433496  | -1.161063 | 0.901749  |
| H | -6.621850  | 0.553961  | 1.244730  |
| C | -9.031876  | -0.712374 | 1.751232  |
| H | -8.812372  | 0.557016  | 0.020391  |
| H | -8.624092  | -1.157620 | -0.320148 |
| H | -10.119361 | -0.813388 | 1.656643  |
| H | -8.642872  | -1.656672 | 2.152204  |
| H | -8.832998  | 0.069534  | 2.494783  |
| C | 6.098164   | -0.014120 | 1.172126  |
| C | 6.950718   | -0.097034 | -0.099076 |
| H | 6.397414   | -0.815112 | 1.859887  |
| H | 6.301350   | 0.937617  | 1.679704  |
| C | 8.444866   | 0.014875  | 0.183647  |
| H | 6.741412   | -1.046509 | -0.611848 |
| H | 6.644708   | 0.700683  | -0.790729 |
| C | 9.289556   | -0.065781 | -1.081251 |
| H | 8.644596   | 0.963316  | 0.702105  |
| H | 8.742028   | -0.783332 | 0.878472  |
| H | 10.359237  | 0.016123  | -0.855744 |
| H | 9.130632   | -1.017951 | -1.602707 |
| H | 9.033308   | 0.740592  | -1.779748 |
| H | -0.412878  | 4.056966  | 0.290275  |
| H | -2.869437  | 3.738407  | 0.217261  |

|   |           |           |           |
|---|-----------|-----------|-----------|
| H | -4.765237 | 2.348759  | -0.249740 |
| S | 1.722538  | 2.386565  | -0.204342 |
| S | -1.579483 | -2.186003 | -1.014825 |

Energies (0K) = -1877.521141

Energies (0K) + ZPE = -1877.058738

Enthalpies (298K) = -1877.030999

Free Energies (298K) = -1877.119582

#### Cation radical

|   |           |           |           |
|---|-----------|-----------|-----------|
| C | -1.956990 | -2.841961 | -0.398873 |
| C | -0.604119 | -2.904449 | -0.273734 |
| C | 0.162500  | -1.717672 | -0.196366 |
| C | -0.418799 | -0.428572 | -0.244567 |
| C | -1.852458 | -0.382467 | -0.376776 |
| C | -2.618592 | -1.587981 | -0.452755 |
| C | 0.401911  | 0.769744  | -0.160901 |
| C | 1.834889  | 0.722871  | -0.023712 |
| C | 2.584964  | -0.476016 | 0.038587  |
| C | 3.973788  | -0.488618 | 0.167377  |
| H | 4.486659  | -1.445629 | 0.203805  |
| C | 4.707577  | 0.695088  | 0.246978  |
| C | 3.997531  | 1.890442  | 0.187454  |
| C | 2.602902  | 1.927822  | 0.055892  |
| H | -2.548662 | -3.750705 | -0.457785 |
| H | -0.099973 | -3.866101 | -0.232757 |
| C | 1.942365  | 3.182933  | -0.002050 |
| C | 0.590239  | 3.245816  | -0.132257 |
| C | -2.601884 | 0.819053  | -0.441889 |
| C | -3.988035 | 0.828252  | -0.568502 |
| C | -4.721349 | -0.359120 | -0.641154 |
| C | -0.177857 | 2.059565  | -0.211953 |
| C | -4.016234 | -1.553401 | -0.581962 |
| H | -4.512500 | 1.780407  | -0.616024 |
| H | -4.548857 | -2.499801 | -0.639220 |

|   |            |           |           |
|---|------------|-----------|-----------|
| C | 6.207130   | 0.718420  | 0.399112  |
| C | 6.924989   | -0.620115 | 0.278218  |
| H | 6.439356   | 1.168117  | 1.375574  |
| H | 6.610312   | 1.419023  | -0.345172 |
| C | 8.438929   | -0.475165 | 0.403929  |
| H | 6.565877   | -1.309699 | 1.055206  |
| H | 6.683987   | -1.085034 | -0.688411 |
| C | 9.170575   | -1.805970 | 0.291961  |
| H | 8.802215   | 0.211792  | -0.373063 |
| H | 8.678171   | -0.003067 | 1.367047  |
| H | 10.254645  | -1.674141 | 0.384771  |
| H | 8.851773   | -2.501719 | 1.078002  |
| H | 8.975697   | -2.286226 | -0.674992 |
| C | -6.220198  | -0.331858 | -0.734445 |
| C | -6.889816  | -0.265274 | 0.644364  |
| H | -6.567072  | -1.228728 | -1.261885 |
| H | -6.532489  | 0.535703  | -1.329034 |
| C | -8.411935  | -0.229937 | 0.554038  |
| H | -6.575074  | -1.132693 | 1.241165  |
| H | -6.531181  | 0.625581  | 1.178854  |
| C | -9.081305  | -0.167692 | 1.920639  |
| H | -8.718228  | 0.637541  | -0.047078 |
| H | -8.762628  | -1.118894 | 0.011470  |
| H | -10.173276 | -0.143518 | 1.829194  |
| H | -8.818013  | -1.039905 | 2.531735  |
| H | -8.773892  | 0.728923  | 2.473003  |
| H | 0.086816   | 4.207768  | -0.175183 |
| H | 2.534343   | 4.091349  | 0.058647  |
| H | 4.530814   | 2.836862  | 0.242036  |
| S | -1.862150  | 2.382352  | -0.377308 |
| S | 1.848205   | -2.038578 | -0.039555 |

Energies (0K) = -1877.373931

Energies (0K) + ZPE = -1876.908672

Enthalpies (298K) = -1876.881007

Free Energies (298K) = -1876.969318

**SDA-3, R=p-MeOC<sub>6</sub>H<sub>4</sub>**

Triplet state

|   |           |           |           |
|---|-----------|-----------|-----------|
| C | 2.105788  | -2.807844 | 0.175362  |
| C | 0.742161  | -2.958550 | 0.004481  |
| C | -0.077816 | -1.860053 | -0.232658 |
| C | 0.427110  | -0.497168 | -0.241990 |
| C | 1.881916  | -0.372336 | -0.184473 |
| C | 2.702847  | -1.520176 | 0.046257  |
| C | -0.436287 | 0.605737  | -0.223248 |
| C | -1.888577 | 0.480272  | -0.121021 |
| C | -2.567544 | -0.739628 | -0.281194 |
| C | -3.955355 | -0.849061 | -0.182244 |
| H | -4.417435 | -1.827074 | -0.286497 |
| C | -4.745430 | 0.271922  | 0.093791  |
| C | -4.094327 | 1.496364  | 0.254668  |
| C | -2.701496 | 1.625761  | 0.146582  |
| H | 2.738847  | -3.667085 | 0.374474  |
| H | 0.297991  | -3.950147 | 0.047832  |
| C | -2.100442 | 2.912230  | 0.268660  |
| C | -0.742959 | 3.064672  | 0.055849  |
| C | 2.555701  | 0.848937  | -0.354939 |
| C | 3.946109  | 0.957562  | -0.299274 |
| C | 4.744433  | -0.165533 | -0.058084 |
| C | 0.068839  | 1.968395  | -0.217457 |
| C | 4.098308  | -1.391718 | 0.110717  |
| H | 4.404795  | 1.936365  | -0.410268 |
| H | 4.684067  | -2.294253 | 0.265328  |
| H | -0.297272 | 4.055842  | 0.094014  |
| H | -2.726746 | 3.769414  | 0.496044  |
| H | -4.674839 | 2.396959  | 0.437840  |
| S | 1.698676  | 2.333955  | -0.707386 |

|   |            |           |           |
|---|------------|-----------|-----------|
| S | -1.722391  | -2.221308 | -0.673969 |
| C | -6.213561  | 0.161447  | 0.206412  |
| C | -6.936410  | -0.747729 | -0.573869 |
| C | -6.935758  | 0.969647  | 1.101022  |
| C | -8.320897  | -0.857256 | -0.479247 |
| H | -6.415801  | -1.371557 | -1.296105 |
| C | -8.312103  | 0.871041  | 1.208808  |
| H | -6.407144  | 1.671156  | 1.741283  |
| C | -9.019648  | -0.044421 | 0.418160  |
| H | -8.841930  | -1.567644 | -1.112177 |
| H | -8.863174  | 1.490724  | 1.910720  |
| O | -10.359069 | -0.067094 | 0.592935  |
| C | -11.114103 | -0.981760 | -0.180892 |
| H | -10.820182 | -2.018801 | 0.022923  |
| H | -12.154493 | -0.838005 | 0.116909  |
| H | -11.014624 | -0.778085 | -1.254250 |
| C | 6.215361   | -0.055458 | 0.010848  |
| C | 6.963086   | -0.871700 | 0.866835  |
| C | 6.915654   | 0.870649  | -0.781162 |
| C | 8.350304   | -0.782674 | 0.940038  |
| H | 6.454310   | -1.581557 | 1.514039  |
| C | 8.294913   | 0.969838  | -0.721795 |
| H | 6.373819   | 1.506540  | -1.476606 |
| C | 9.027330   | 0.142694  | 0.140360  |
| H | 8.888387   | -1.428520 | 1.625621  |
| H | 8.830951   | 1.679073  | -1.346298 |
| O | 10.367533  | 0.312109  | 0.127409  |
| C | 11.149119  | -0.513212 | 0.971981  |
| H | 12.186619  | -0.220604 | 0.799500  |
| H | 10.901232  | -0.356211 | 2.028936  |
| H | 11.026753  | -1.574327 | 0.721954  |

Energies (0K) = -2253.735743

Energies (0K) + ZPE = -2253.272675

Enthalpies (298K) = -2253.241804

Free Energies (298K) = -2253.335816

Cation radical

|   |           |           |          |
|---|-----------|-----------|----------|
| C | 2.091601  | 2.922674  | 0.020379 |
| C | 0.737187  | 3.046228  | 0.014422 |
| C | -0.086318 | 1.895200  | 0.014160 |
| C | 0.439077  | 0.580963  | 0.014487 |
| C | 1.872845  | 0.470688  | 0.018412 |
| C | 2.697562  | 1.639192  | 0.027689 |
| C | -0.439070 | -0.580958 | 0.014490 |
| C | -1.872838 | -0.470688 | 0.018441 |
| C | -2.574840 | 0.761775  | 0.015791 |
| C | -3.962186 | 0.835194  | 0.029543 |
| H | -4.434510 | 1.813210  | 0.059667 |
| C | -4.758599 | -0.318793 | 0.037342 |
| C | -4.096070 | -1.544905 | 0.034056 |
| C | -2.697558 | -1.639189 | 0.027718 |
| H | 2.726562  | 3.803827  | 0.021692 |
| H | 0.277424  | 4.030901  | 0.011351 |
| C | -2.091594 | -2.922673 | 0.020412 |
| C | -0.737180 | -3.046223 | 0.014463 |
| C | 2.574858  | -0.761772 | 0.015663 |
| C | 3.962209  | -0.835177 | 0.029280 |
| C | 4.758603  | 0.318825  | 0.037175 |
| C | 0.086331  | -1.895192 | 0.014162 |
| C | 4.096077  | 1.544926  | 0.034005 |
| H | 4.434538  | -1.813192 | 0.059232 |
| H | 4.662955  | 2.470945  | 0.013053 |
| H | -0.277416 | -4.030897 | 0.011435 |
| H | -2.726559 | -3.803824 | 0.021744 |
| H | -4.662967 | -2.470911 | 0.013030 |
| S | 1.763804  | -2.291422 | 0.010740 |
| S | -1.763793 | 2.291425  | 0.010748 |
| C | 6.228982  | 0.235344  | 0.046001 |



|   |            |           |           |
|---|------------|-----------|-----------|
| C | 6.901927   | -0.830076 | -0.564696 |
| C | 7.005789   | 1.229239  | 0.668403  |
| C | 8.289889   | -0.913240 | -0.565931 |
| H | 6.340174   | -1.604749 | -1.080012 |
| C | 8.386258   | 1.157457  | 0.679688  |
| H | 6.520235   | 2.057557  | 1.177420  |
| C | 9.044127   | 0.084938  | 0.060163  |
| H | 8.771983   | -1.748822 | -1.061478 |
| H | 8.981160   | 1.920471  | 1.173317  |
| C | -6.228981  | -0.235309 | 0.046134  |
| C | -7.005829  | -1.229252 | 0.668449  |
| C | -6.901909  | 0.830163  | -0.564489 |
| C | -8.386287  | -1.157481 | 0.679634  |
| H | -6.520272  | -2.057548 | 1.177497  |
| C | -8.289873  | 0.913327  | -0.565812 |
| H | -6.340106  | 1.604934  | -1.079602 |
| C | -9.044126  | -0.084946 | 0.060088  |
| H | -8.981271  | -1.920474 | 1.173199  |
| H | -8.771931  | 1.749021  | -1.061212 |
| O | -10.389594 | -0.104194 | 0.119943  |
| O | 10.389590  | 0.104143  | 0.120061  |
| C | -11.100746 | 0.966874  | -0.478270 |
| H | -12.157848 | 0.751572  | -0.313062 |
| H | -10.848443 | 1.925264  | -0.008689 |
| H | -10.906855 | 1.023448  | -1.556118 |
| C | 11.100693  | -0.967042 | -0.478016 |
| H | 12.157784  | -0.752075 | -0.312318 |
| H | 10.847936  | -1.925418 | -0.008657 |
| H | 10.907215  | -1.023414 | -1.555951 |

Energies (0K) = -2253.625463

Energies (0K) + ZPE = -2253.157927

Enthalpies (298K) = -2253.127512

Free Energies (298K) = -2253.219684

## SeDA

### Triplet state

|    |           |           |           |
|----|-----------|-----------|-----------|
| C  | 1.734656  | -3.066366 | 0.701392  |
| C  | 0.384985  | -3.070055 | 0.411983  |
| C  | -0.271251 | -1.900007 | 0.049118  |
| C  | 0.373078  | -0.596805 | 0.056028  |
| C  | 1.841711  | -0.645925 | 0.164373  |
| C  | 2.490825  | -1.874252 | 0.519850  |
| C  | -0.373069 | 0.596798  | 0.056047  |
| C  | -1.841702 | 0.645930  | 0.164367  |
| C  | -2.687984 | -0.450113 | -0.077517 |
| C  | -4.079309 | -0.372812 | 0.033679  |
| H  | -4.679894 | -1.256034 | -0.167204 |
| C  | -4.682602 | 0.819518  | 0.412158  |
| C  | -3.889821 | 1.928828  | 0.653958  |
| C  | -2.490805 | 1.874253  | 0.519889  |
| H  | 2.244425  | -3.974938 | 1.007599  |
| H  | -0.181643 | -3.997174 | 0.454969  |
| C  | -1.734616 | 3.066342  | 0.701530  |
| C  | -0.384936 | 3.070033  | 0.412122  |
| C  | 2.687987  | 0.450134  | -0.077490 |
| C  | 4.079299  | 0.372863  | 0.033782  |
| C  | 4.682602  | -0.819465 | 0.412276  |
| C  | 0.271275  | 1.900009  | 0.049174  |
| C  | 3.889840  | -1.928801 | 0.653986  |
| H  | 4.679877  | 1.256098  | -0.167063 |
| H  | 4.341954  | -2.875811 | 0.937712  |
| H  | 0.181699  | 3.997146  | 0.455145  |
| H  | -2.244373 | 3.974899  | 1.007800  |
| H  | -4.341930 | 2.875835  | 0.937703  |
| H  | 5.762722  | -0.878152 | 0.512494  |
| H  | -5.762726 | 0.878234  | 0.512312  |
| Se | 2.003333  | 2.112873  | -0.597049 |

Se -2.003365 -2.112895 -0.596942

Energies (0K) = -5565.377241

Energies (0K) + ZPE = -5565.144086

Enthalpies (298K) = -5565.127449

Free Energies (298K) = -5565.188849

Cation radical

C 1.826632 -3.132586 -0.002679

C 0.471741 -3.116432 -0.001593

C -0.234985 -1.890163 -0.000368

C 0.394516 -0.621798 -0.000443

C 1.849303 -0.657582 -0.000757

C 2.546460 -1.913426 -0.001955

C -0.394521 0.621795 -0.000662

C -1.849310 0.657584 -0.000751

C -2.697320 -0.480346 0.000630

C -4.088399 -0.392315 0.001136

H -4.674202 -1.308097 0.002328

C -4.725057 0.841920 -0.000112

C -3.950416 1.983614 -0.001840

C -2.546467 1.913433 -0.002065

H 2.376375 -4.069141 -0.003764

H -0.090129 -4.046622 -0.001777

C -1.826622 3.132586 -0.003335

C -0.471736 3.116426 -0.002414

C 2.697333 0.480351 0.000562

C 4.088397 0.392317 0.000712

C 4.725056 -0.841931 -0.000749

C 0.234992 1.890150 -0.000682

C 3.950423 -1.983616 -0.002140

H 4.674232 1.308082 0.001825

H 4.411163 -2.967150 -0.003214

H 0.090136 4.046615 -0.003054

H -2.376366 4.069141 -0.004717

|    |           |           |           |
|----|-----------|-----------|-----------|
| H  | -4.411187 | 2.967134  | -0.002862 |
| H  | 5.808881  | -0.899851 | -0.000722 |
| H  | -5.808881 | 0.899868  | 0.000269  |
| Se | 2.047646  | 2.204624  | 0.002188  |
| Se | -2.047650 | -2.204620 | 0.001715  |

Energies (0K) = -5565.268040  
Energies (0K) + ZPE = -5565.030069  
Enthalpies (298K) = -5565.013897  
Free Energies (298K) = -5565.074265

## 7. Reference

1. S. Moon, Y. Nishii and Masahiro. Miura, *Org. Lett.*, 2019, **21**, 233–236.
2. O. Matuszewska, T. Battisti, R. R. Ferreira, N. Biot, N. Demitri, C. Mézière, M. Allain, M. Sallé, S. Mañas-Valero, E. Coronado, E. Fresta, R. D. Costa and D. Bonifazi, *Chem. - Eur. J.*, 2023, **29**, e202203115.
3. B. L. Buss, C.-H. Lim and G. M. Miyake, *Angew. Chem. Int. Ed.*, 2020, **59**, 3209–3217.
4. Q. Ma, J. Song, X. Zhang, Y. Jiang, L. Ji and S. Liao, *Nat. Commun.*, 2021, **12**, 429.
